# Supplementary material
Source: PubMed Central journal article supplement (PMC4425616)
Supplement: NIHMS672872-supplement-1.pdf [file NIHMS672872-supplement-1.pdf]

# Supplementary Information Titles

Please list each supplementary item and its title or caption, in the order shown below.

**Note that we do NOT copy edit or otherwise change supplementary information, and minor (nonfactual) errors in these documents cannot be corrected after publication.** Please submit document(s) exactly as you want them to appear, with all text, images, legends and references in the desired order, and check carefully for errors.

**Journal:** Nature Medicine

|                              |                                                                                                                  |
|------------------------------|------------------------------------------------------------------------------------------------------------------|
| <b>Article Title:</b>        | Active Pin1 is a key target of all- <i>trans</i> retinoic acid in acute promyelocytic leukemia and breast cancer |
| <b>Corresponding Author:</b> | Kun Ping Lu                                                                                                      |
|                              |                                                                                                                  |

| Supplementary Item & Number<br>(add rows as necessary) | Title or Caption                                                                                                                                                                                                                                                          |
|--------------------------------------------------------|---------------------------------------------------------------------------------------------------------------------------------------------------------------------------------------------------------------------------------------------------------------------------|
| Supplementary Figure 1                                 | Summary of selected Pin1 substrates                                                                                                                                                                                                                                       |
| Supplementary Figure 2                                 | Characterization of the interaction between Pin1 and HTS probe pTide or ATRA                                                                                                                                                                                              |
| Supplementary Figure 3                                 | ATRA-dose-dependently binds and fully inhibits Pin1, but not Cyclophilin or FKBP12                                                                                                                                                                                        |
| Supplementary Figure 4                                 | The carboxylic group of ATRA as a pharmacophore for binding to Pin1 and co-crystal structure of ATRA and Pin1 PPIase domain                                                                                                                                               |
| Supplementary Figure 5                                 | Characterization of the ability of the pan-RAR activator AC-93253, the pan-RAR inhibitor Ro-415253, and ATRA to bind Pin1 and transactivate RAR downstream target genes                                                                                                   |
| Supplementary Figure 6                                 | Pin1 interacts with PML-RAR- $\alpha$ containing S581 and increase PML-RAR- $\alpha$ protein stability in NB4 cells                                                                                                                                                       |
| Supplementary Figure 7                                 | Pin1 interacts with PML-RAR- $\alpha$ but much less with PLZF-RAR- $\alpha$ , and Pin1 knockdown reduces protein stability of PML-RAR- $\alpha$ but much less on PLZF-RAR- $\alpha$ in NB4                                                                                |
| Supplementary Figure 8                                 | Doxycycline-induced Pin1 KD or other structurally distinct Pin1 inhibitors effectively inhibits spleen size or cell proliferation of transplanted APL cells                                                                                                               |
| Supplementary Figure 9                                 | ATRA induces Pin1 and PML-RAR- $\alpha$ degradation in vitro                                                                                                                                                                                                              |
| Supplementary Figure 10                                | Ser71 phosphorylation prevents ATRA from interacting with Pin1, and cytochrome P450 inhibitor, pan-RAR activator or inhibitor has no obvious effect on the ability of ATRA to inhibit cell growth or to induce Pin1 or cyclin D1 degradation of human breast cancer cells |

|                         |                                                                        |
|-------------------------|------------------------------------------------------------------------|
| Supplementary Figure 11 | Summary schemes                                                        |
| Supplementary Table 1   | Data collection and refinement statistics                              |
| Supplementary Table 2   | Fold change of transcripts in ATRA-treated or Pin1 knockdown NB4 cells |
| Supplementary Table 3   | Patient information on APL human samples                               |
| Supplementary Table 4   | Patient information on triple negative breast cancer human samples     |
| Supplementary Methods   |                                                                        |

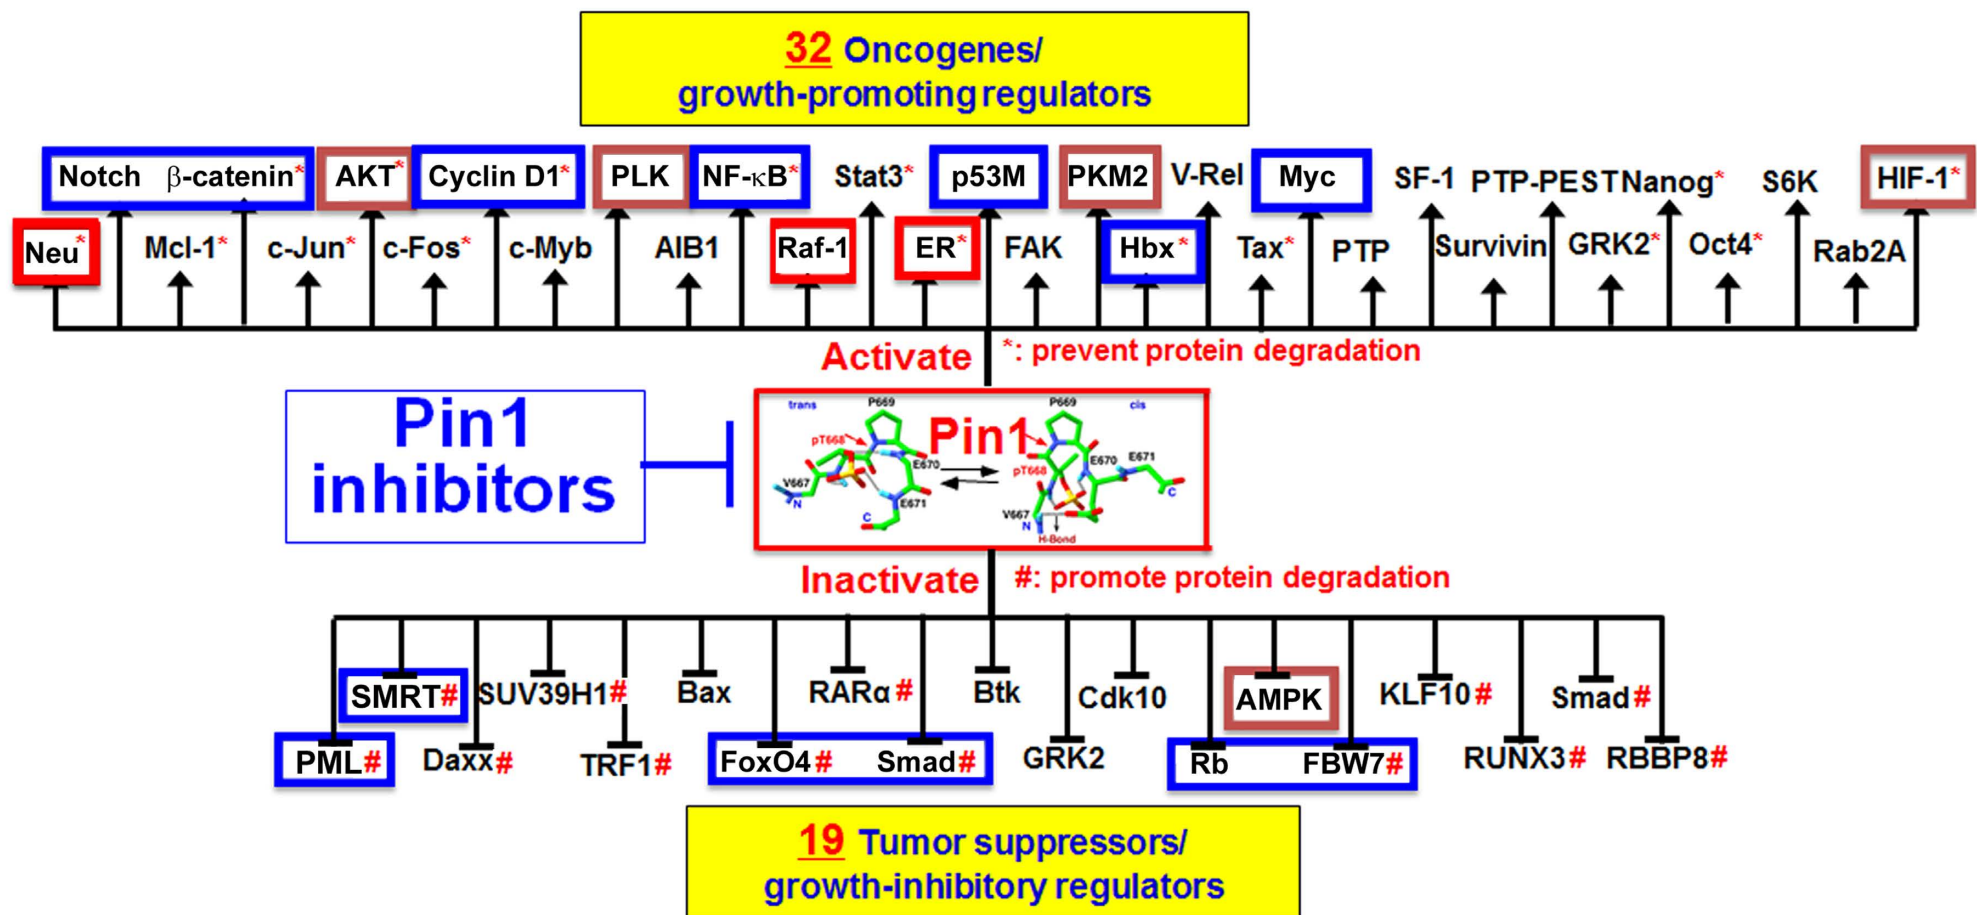

Figure S1: Summary of selected Pin1 substrates including 32 oncogenes and 19 tumor suppressors and their druggable potentials that have been color coded. Red box, drug targets; Brown box, hot targets; Blue box, dream targets but non-druggable. \* denotes prevent protein degradation; # denotes promote protein degradation.

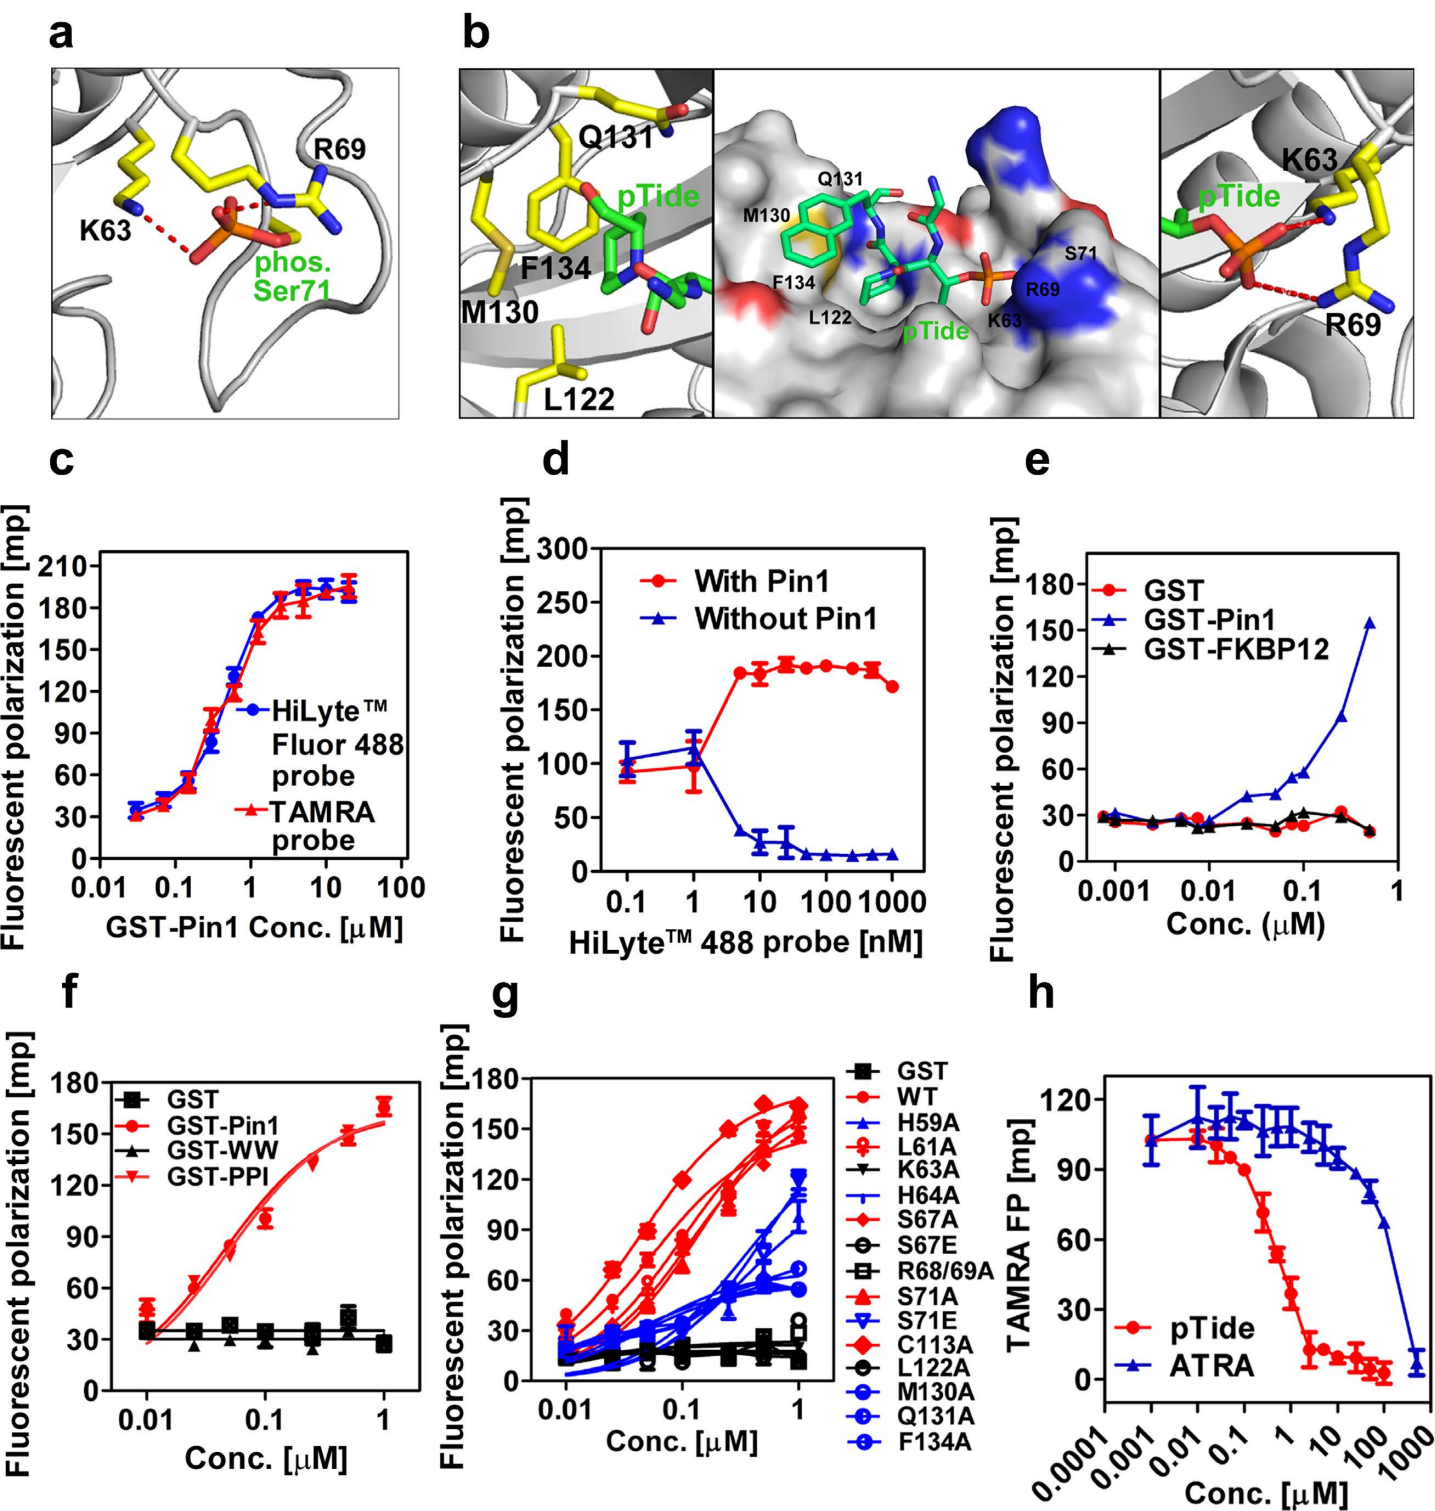

**Figure S2: Characterization of the interaction between Pin1 and the HTS probe pTide or ATRA.**

(a) Pin1 S71 phosphorylation inhibits its catalytic activity likely due to salt bridges between pS71 phosphate group and K63 and R69 residues, based on modeling<sup>7</sup>.

(b) The published Pin1-pTide structure<sup>29</sup> shows salt bridges between the phosphate group of pTide and K63 and R69 of Pin1 (right panel) and the hydrophobic interaction between homoproline (Pip) of pTide and L122, M130, Q131 and F134 of Pin1 (left panel).

(c) HiLyte™ Fluor 488- or TAMRA-conjugated probe pTide interacted with Pin1 in a dose-dependent manner.

(d) FP binding curve between HiLyte™ Fluor 488-conjugated pTide with or without Pin1.

(e) HiLyte™ Fluor 488 probe pTide specifically interacted with Pin1, but not FKBP12.

(f) HiLyte™ Fluor 488 probe pTide specifically interacted with Pin1 catalytic PPIase domain, but not WW domain.

(g) pTide-HiLyte™ Fluor 488 was incubated with different Pin1 point mutants for 0.5 h, before FP readout.

(h) ATRA was able to compete the interaction between TAMRA-conjugated pTide and Pin1.

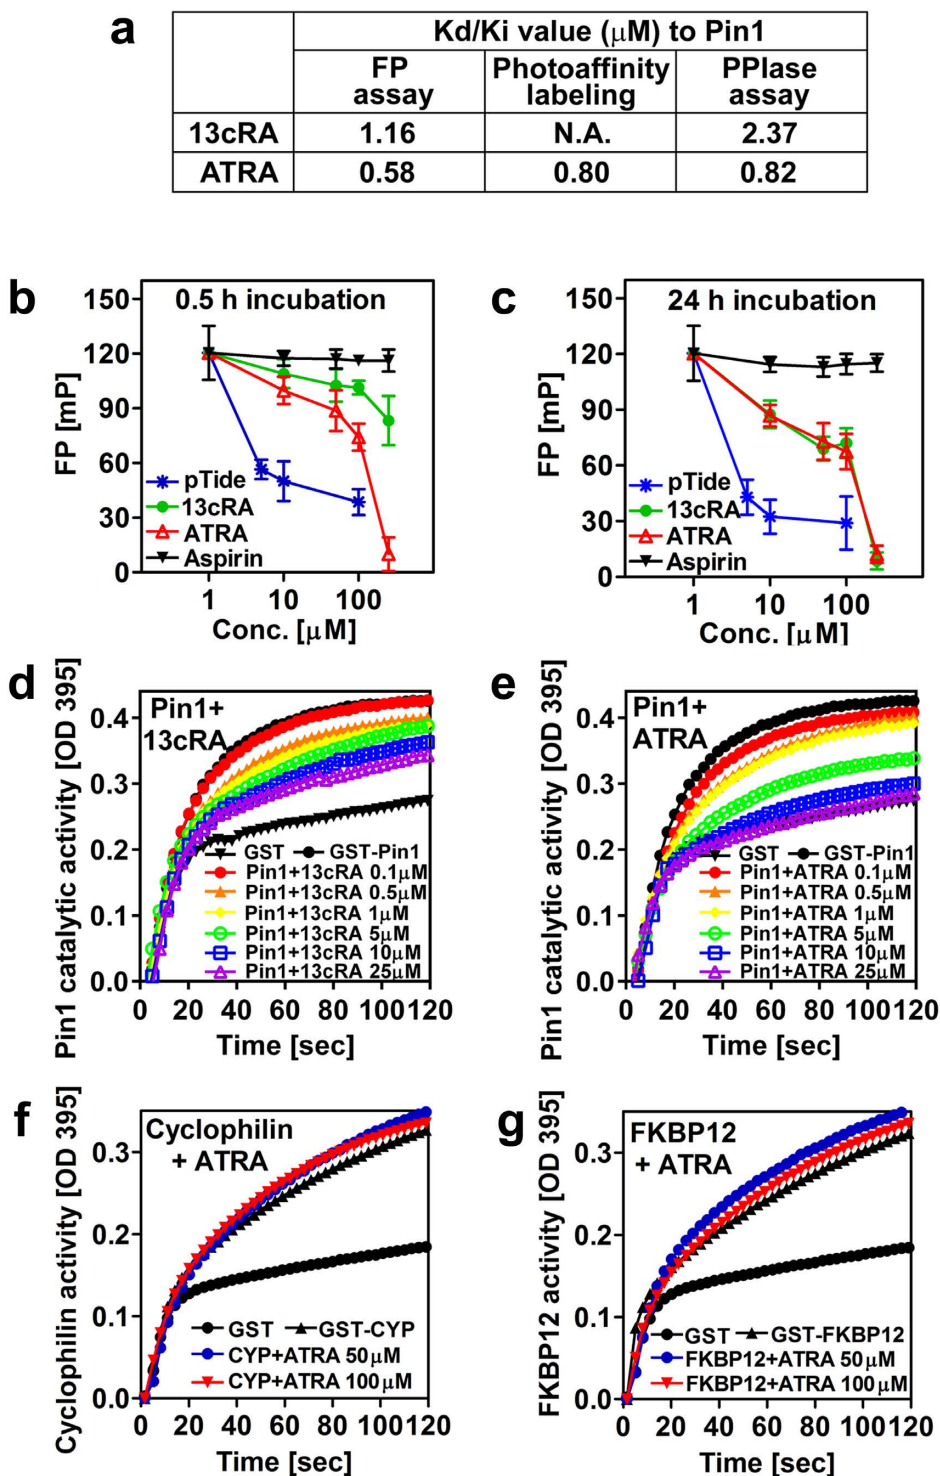

**Figure S3: ATRA dose-dependently binds and fully inhibits Pin1, but not Cyclophilin or FKBP12.**

(a) Summary table of the  $K_i$  or  $K_d$  values of ATRA and 13cRA for Pin1 obtained from FP, photoaffinity labeling and PPlase assays.

(b and c) HiLyte™ Fluor 488-pTide was added to Pin1, followed by incubation with different concentrations of cold pTide, ATRA, 13cRA or salicylic acid for 0.5 h (b) or 24 hr (c) before FP readout.

(d and e) 13cRA (d) and ATRA (e) dose-dependently inhibited Pin1 catalytic activity, as assayed using in vitro PPlase assay.

(f and g) In the in vitro PPlase assay, ATRA up to 100  $\mu\text{M}$  remained unable to inhibit other isomerase families, Cyclophilin (f) and FKBP12 (g).



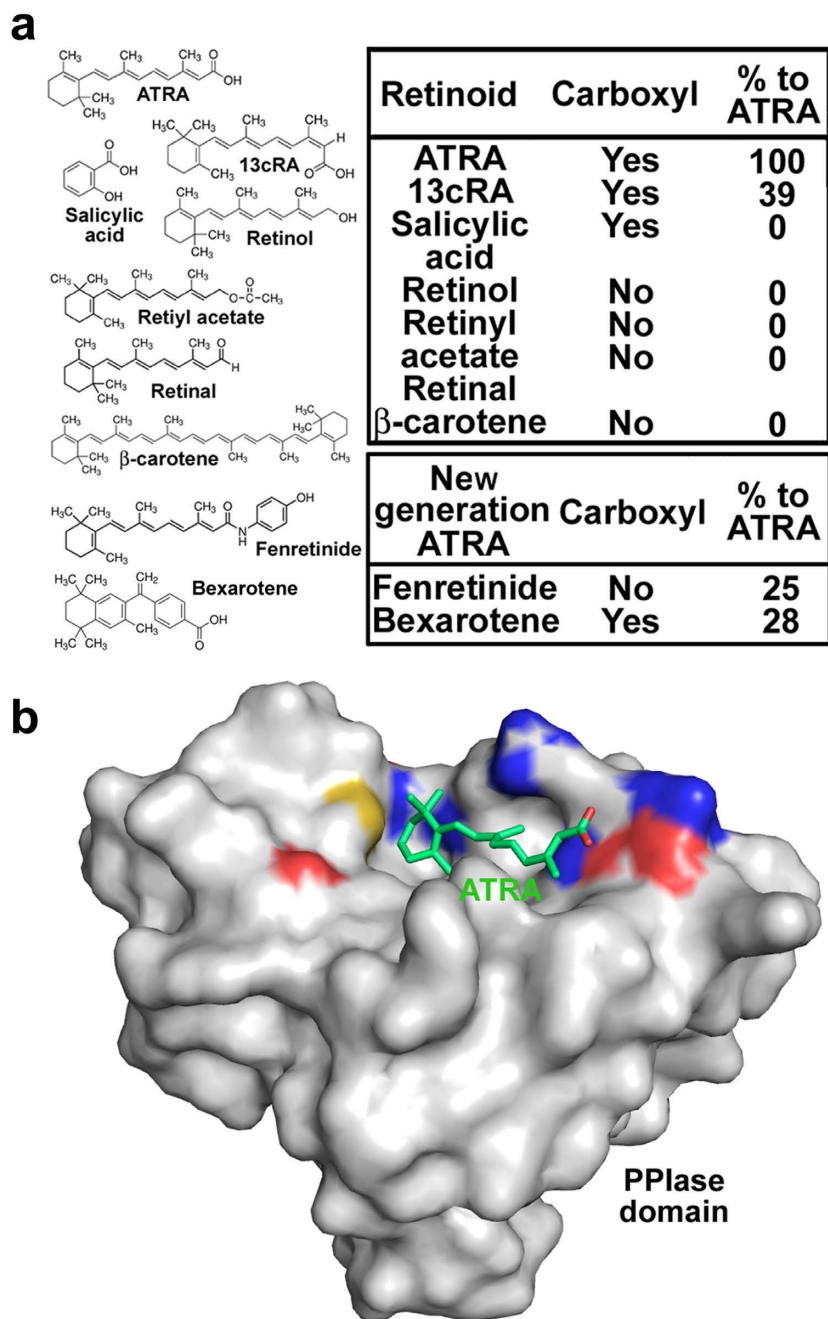

**Figure S4: The carboxylic group of ATRA as a pharmacophore for binding to Pin1 and co-crystal structure of ATRA and Pin1 PPlase domain.**

(a) Structures of ATRA and other retinoids including new generations of retinoid drugs and their binding to Pin1, as assayed by the FP assay. Carboxyl, carboxylic group (-COOH); % to ATRA, percentage of Pin1 inhibition compared to ATRA from the FP assay readout.  
 (b) Full view of co-crystal structure of ATRA and Pin1 PPlase domain.

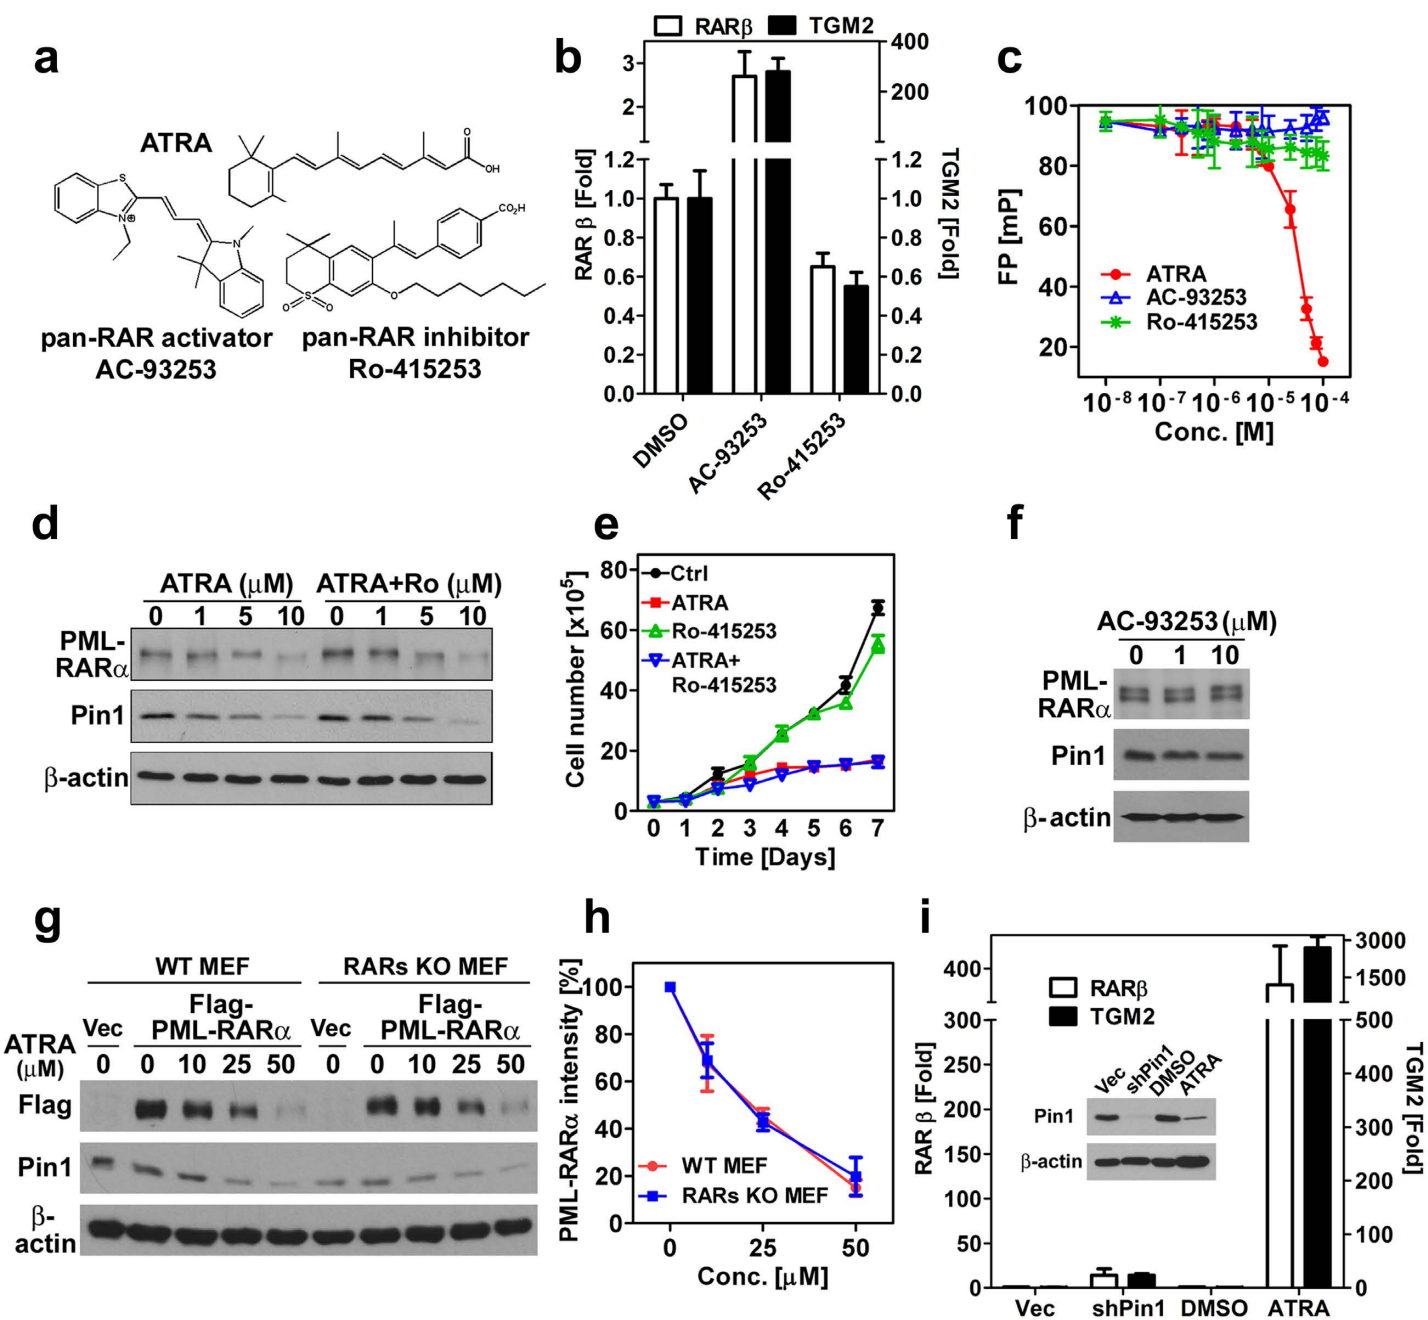

**Figure S5: Characterization of the ability of the pan-RAR activator AC-93253, the pan-RAR inhibitor Ro-415253, and ATRA to bind Pin1 and transactivate RAR downstream target genes.**

(a) Structures of the pan-RAR activator AC-93253 and the pan-RAR inhibitor Ro-415253.

(b) AC-93253 effectively transactivated RAR downstream targets, RARβ and TGM2, while Ro-415253 suppressed them.

(c) ATRA interacted with Pin1 but not AC-93253 or Ro-415253, as measured by FP assay.

(d) Ro-415253 was unable to restore ATRA-mediated Pin1 degradation.

(e) Ro-415253 was unable to rescue NB4 cell proliferation suppressed by ATRA.

(f) AC-93253 was unable to lead to Pin1 degradation in NB4 cells.

(g and h) ATRA caused degradation of Flag-PML-RARα and Pin1 in both WT and RARs triple KO MEFs.

(i) ATRA effectively and significantly transactivated RAR downstream targets, while Pin1 KD marginally induced it. Inset, Pin1 levels in response to different treatments.

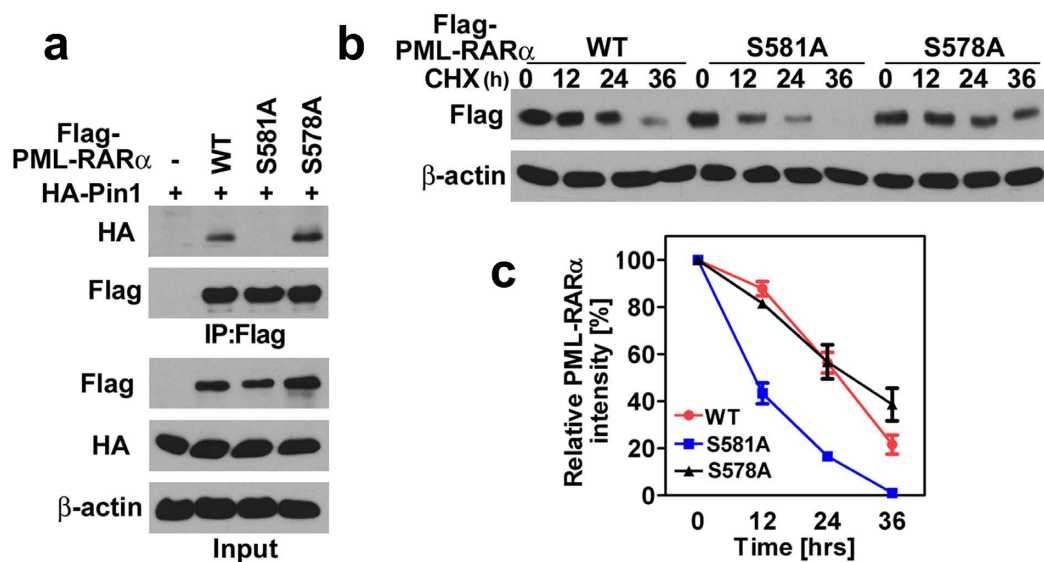

**Figure S6: Pin1 interacts with PML-RAR $\alpha$  containing S581 and increases PML-RAR $\alpha$  protein stability in NB4 cells.**

(a) HA-Pin1 Co-IPed with Flag-PML-RAR $\alpha$ , but not its S581A mutant.

(b and c) S581A Flag-PML-RAR $\alpha$  demonstrated shortened protein half-life than that of WT or S578A mutant Flag-PML-RAR $\alpha$ .



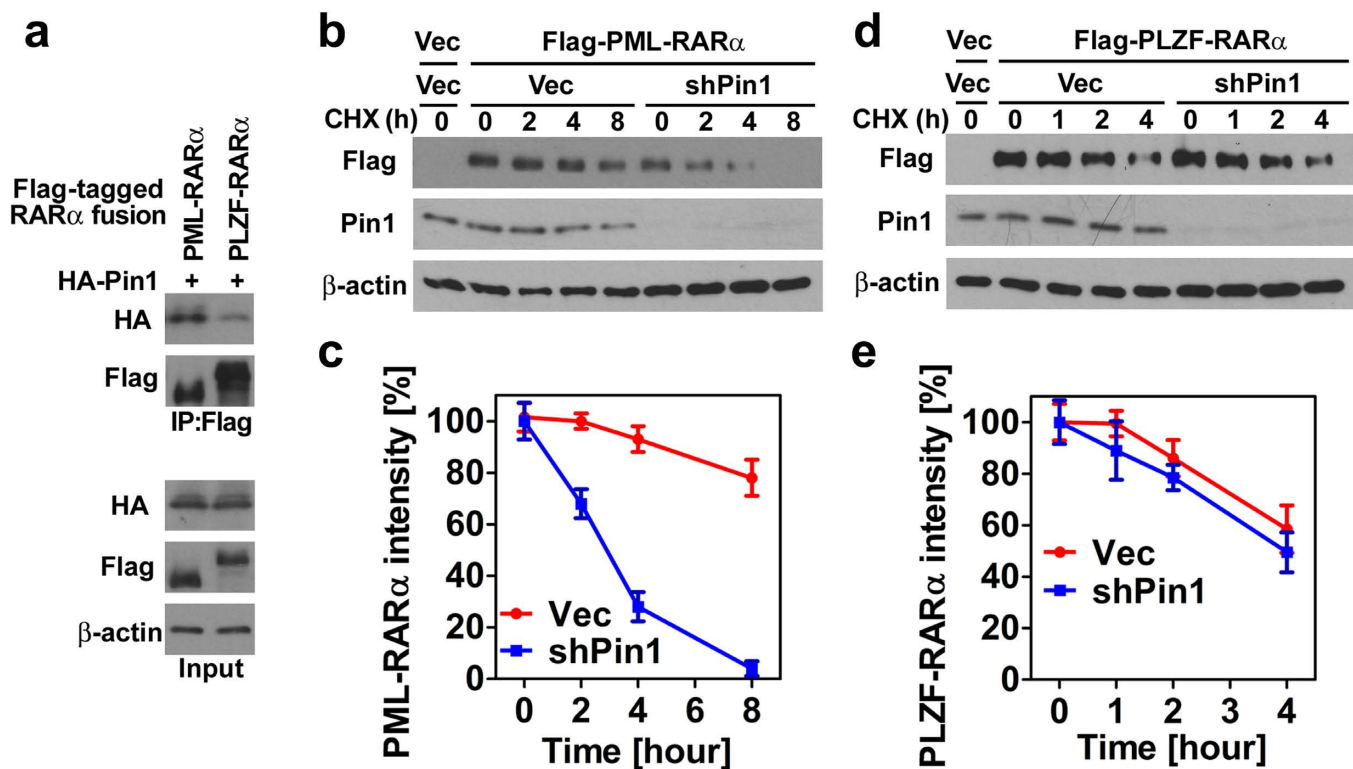

**Figure S7: Pin1 interacts with PML-RAR $\alpha$  but much less with PLZF-RAR $\alpha$ , and Pin1 knockdown reduces protein stability of PML-RAR $\alpha$  but much less on PLZF-RAR $\alpha$ .**

(a) HA-Pin1 Co-IPed with Flag-PML-RAR $\alpha$  more than Flag-PLZF-RAR $\alpha$ .

(b-e) Flag-PML-RAR $\alpha$  (b and c) but not Flag-PLZF-RAR $\alpha$  (d and e) demonstrated significantly shorter protein half-life in Pin1 knockdown cells.

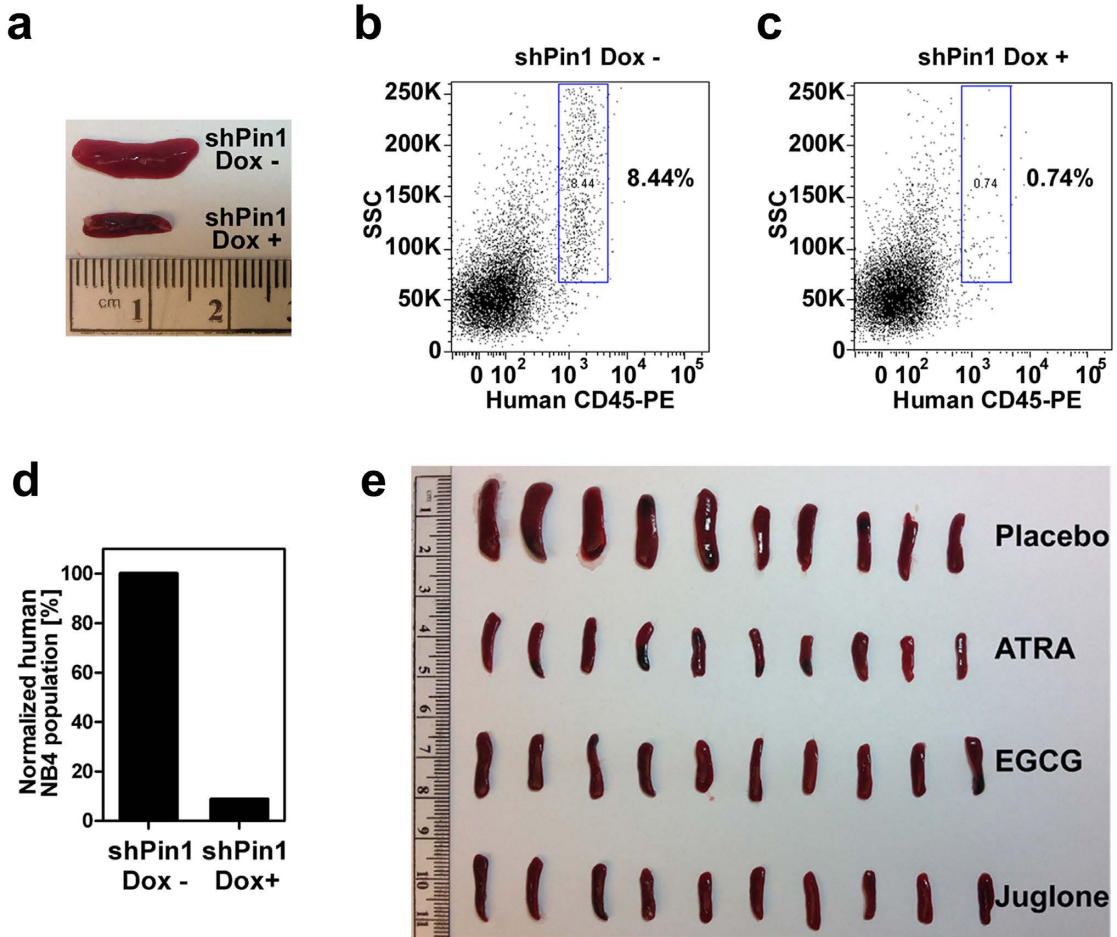

**Figure S8: Doxycycline-induced Pin KD or other structurally distinct Pin1 inhibitors effectively inhibit spleen size or cell proliferation of transplanted APL cells.**

(a) Splenomegaly of the mice fed doxycycline food was smaller than those fed regular food.  
 (b-d) The number of NB4 cells in the transplanted mice fed doxycycline food (b) was significantly less than that in the mice fed regular food (c), with quantification results being presented (d).  
 (e) Pin1 inhibitors, EGCG and Juglone, inhibited splenomegaly as nearly effective as ATRA did.

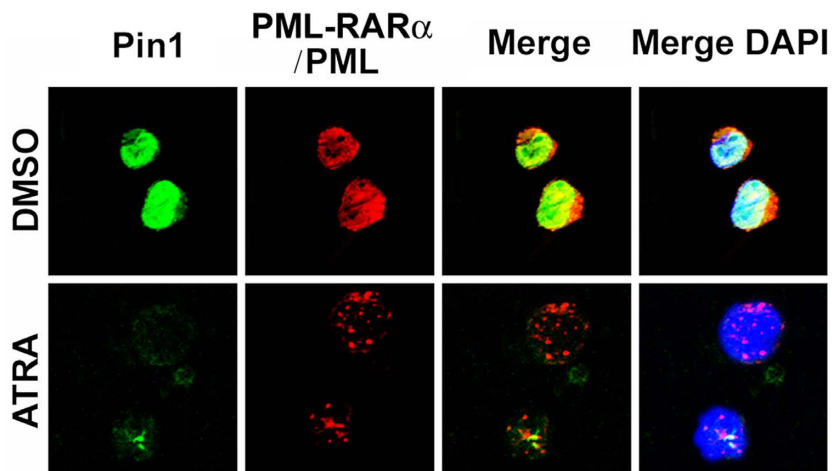

**Figure S9: ATRA induces Pin1 and PML-RAR $\alpha$  degradation in vitro.**  
 Reduced expression of Pin1 and PML-RAR $\alpha$  was observed in APL NB4 cells received 10  $\mu$ M ATRA for 96 hours.

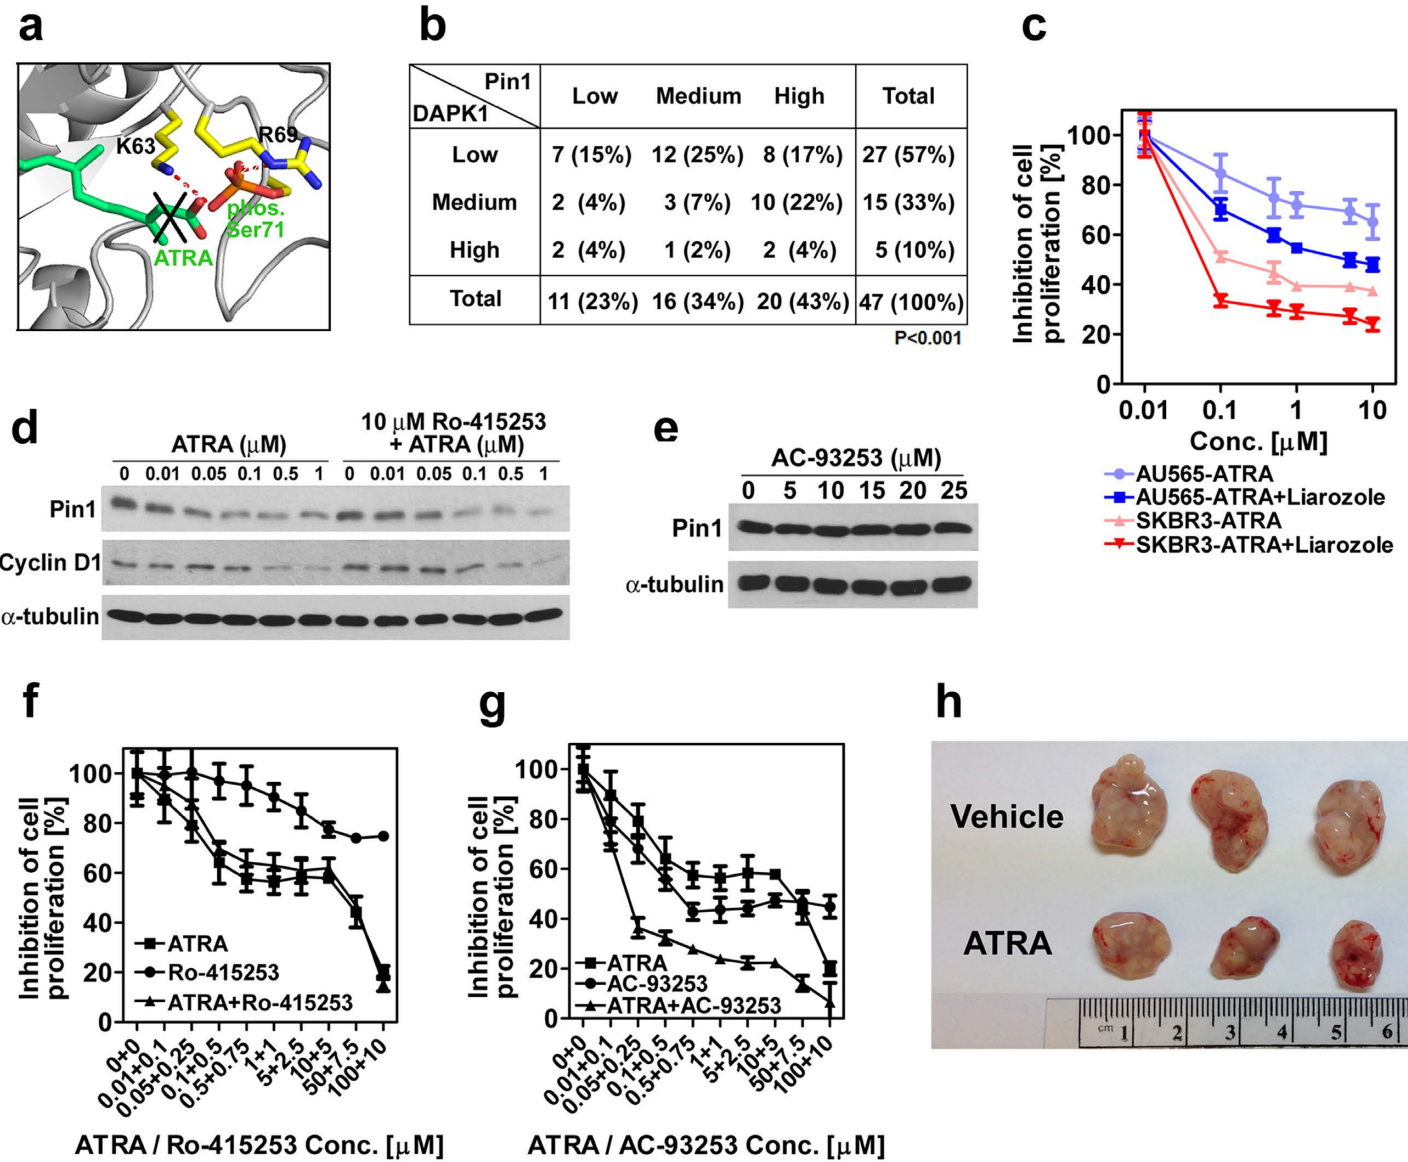

**Figure S10: Ser71 phosphorylation prevents ATRA from interacting with Pin1, and cytochrome P450 inhibitor, pan-RAR activator or inhibitor has no obvious effect on the ability of ATRA to inhibit cell growth or to induce Pin1 or cyclin D1 degradation of human breast cancer cells.**

(a) S71 phosphorylation formed hydrogen bonds with Arg69 and Lys63 in the Pin1 active site, preventing the carboxylic acid of ATRA from binding to the same active site residues.

(b) A quantification of the inverse correlation of Pin1 and DAPK1 shown in Fig. 5c (n=48).

(c) Cytochrome P450 inhibitor, Liarozole, generally enhanced the anti-proliferation effect of ATRA in ATRA-irresponsible AU565 or -responsive SKBR3 cells.

(d) Pan-RAR inhibitor Ro-415253 was unable to reverse ATRA-induced Pin1 or cyclin D1 degradation in T47D cells.

(e) Pan-RAR activator AC-93253 was unable to trigger Pin1 degradation in T47D cells.

(f and g) Pan-RAR inhibitor Ro-415253 was unable to rescue ATRA-mediated anti-proliferative effects (f), while co-treatment of ATRA and pan-RAR activator AC-93253 resulted in an additive effect on cell growth in T47D cells (g).

(h) Tumor sizes of MDA-MB-231-based xenograft tumors treated with placebo or ATRA intraperitoneally.

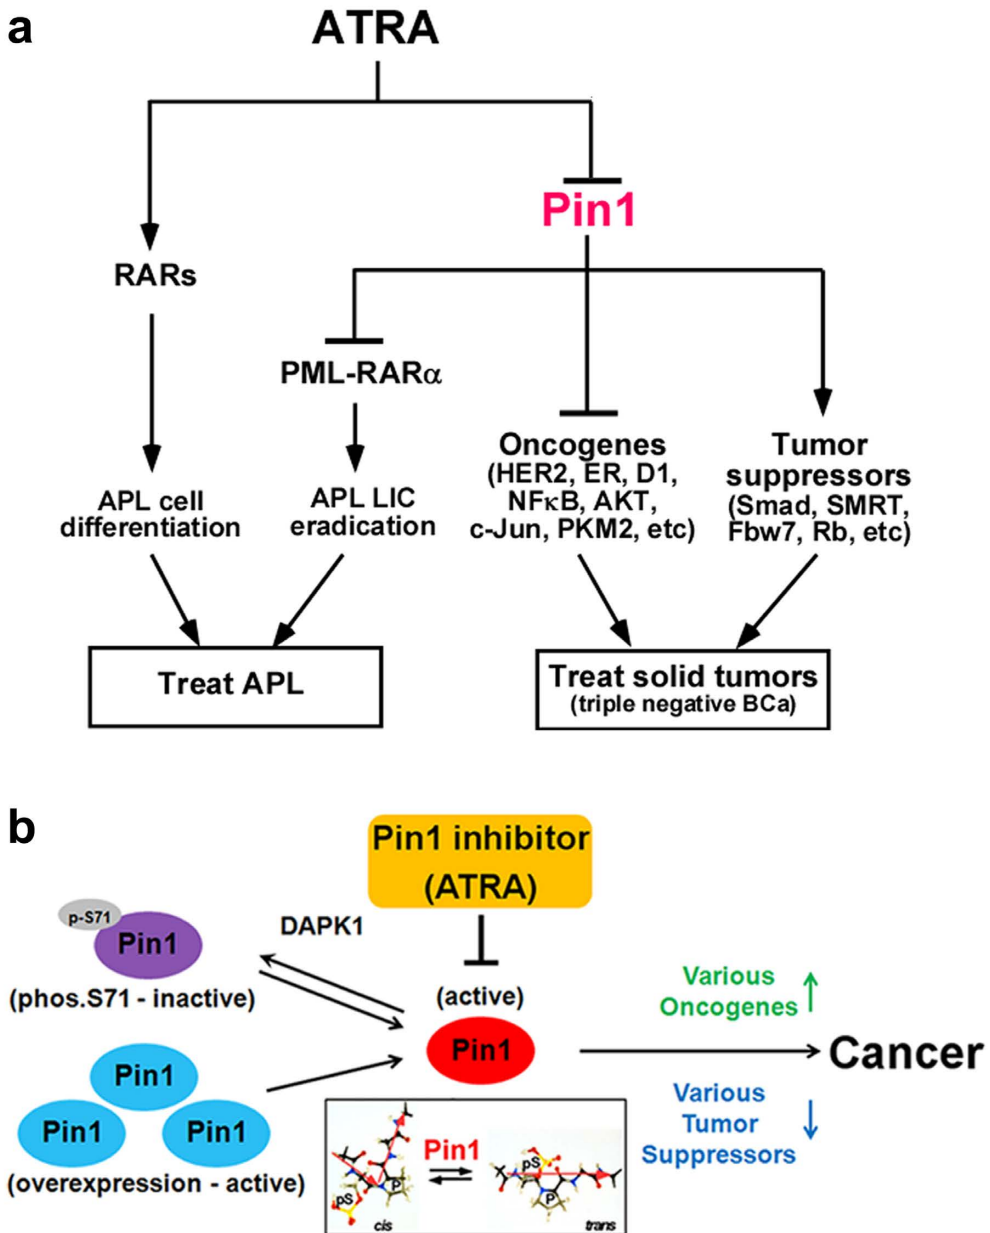

**Figure S11: (a)** A summary scheme depicting the molecular targets and their therapeutic effects of ATRA against APL and other solid cancers such as triple negative breast cancer. **(b)** In cancers, Pin1 becomes activated due to loss of the inhibitory kinase and tumor suppressor DAPK1 and/or overexpression, thereby activating many oncogenes and inactivating many tumor suppressors to promote tumorigenesis by catalyzing cis-trans isomerization of specific pSer/Thr-Pro motifs. ATRA directly binds, inhibits and ultimately degrades active Pin1 selectively in cancer cells to exert potent anticancer activity against both APL and TNBC by blocking multiple cancer-driving pathways simultaneously.



Table S1. Data Collection and Refinement Statistics

|                                      |                      |                              |
|--------------------------------------|----------------------|------------------------------|
| Data statistics                      | PPIase K7782Q ATRA   |                              |
| Source                               | ALS 5.0.2            |                              |
| Wavelength (Å)                       | 1.00Å                |                              |
| Resolution (Å)                       | 50-1.33 (1.35-1.33)  |                              |
| Space group                          | C2                   |                              |
| Unit Cell (Å) a, b, c                | 117.81, 36.29, 51.70 |                              |
| Unit Cell Angel                      | 90, 101, 90          |                              |
| Data cutoff                          | $F > 0$              |                              |
| Assymetric unit (asu)                | 2                    |                              |
| Number of unique reflections         | 49111                |                              |
| Redundancy                           | 3.6 (3.4)            |                              |
| Completeness (%)                     | 98.3 (96.7)          |                              |
| $I/\sigma(I)$                        | 64.9 (2.9)           |                              |
| $R_{sym}$ (%)                        | 4.9                  |                              |
| Refinement statistics                |                      |                              |
| Refinement                           |                      |                              |
| Resolution limit (Å)                 | 57.84-1.33           |                              |
| No. reflections (test)               | 46613 (3177)         |                              |
| Data cutoff                          | None                 |                              |
| $R_{work}/R_{free}$ (%) <sup>b</sup> | 17.8/19.8            |                              |
| No. atoms                            | 2024                 |                              |
| protein                              | 1880                 |                              |
| All trans RA                         | 22                   |                              |
| Water                                | 122                  |                              |
| $B$ -factors (Å <sup>2</sup> )       | 15.1                 |                              |
| protein                              | 14.4                 |                              |
| All trans RA                         | 36.4                 |                              |
| Water                                | 22.2                 |                              |
| R.m.s deviations                     |                      |                              |
| Bond lengths (Å)                     | 0.02                 |                              |
| Bond angles (°)                      | 1.96                 |                              |
| Ramachandran plot (%)                |                      |                              |
| Most favored regions                 | 97                   |                              |
| Additional allowed regions           | 3                    |                              |
| Generously allowed regions           | 0                    |                              |
| Disallowed regions                   | 0                    |                              |
| MolProbity score <sup>^</sup>        | 1.25                 | 94 <sup>th</sup> percentile* |
| Bad Rotamer                          | 0.97%                |                              |
| Clashscore                           | 4.83                 | 88 <sup>th</sup> percentile* |

\* 100th percentile is the best among structures of comparable resolution; 0th percentile is the worst. For clashscore the comparative set of structures was selected in 2004, for MolProbity score in 2006

<sup>^</sup> MolProbity score combines the clashscore, rotamer, and Ramachandran evaluations into a single score, normalized to be on the same scale as X-ray resolution.

**Table S2. Fold change of transcripts in ATRA-treated or Pin1 knockdown NB4 cells**

| Transcript ID   | Fold Change (DMSO vs ATRA) | Fold Change (Vector vs Pin1 KD) | Gene Symbol       | Description                                                                                                                                        | Group     |
|-----------------|----------------------------|---------------------------------|-------------------|----------------------------------------------------------------------------------------------------------------------------------------------------|-----------|
| TC03000107.hg.1 | 10.83                      | 12.39                           | OTTHUMG0000155317 | NULL                                                                                                                                               | Coding    |
| TC09000737.hg.1 | 8.52                       | 6.23                            |                   | ncrna:snoRNA<br>chromosome:GRCh37:9:133325241:133325342:1<br>gene:ENSG00000238298<br>gene_biotype:snoRNA<br>transcript_biotype:snoRNA              | Coding    |
| TC04002094.hg.1 | 5.94                       | 5.67                            |                   | accn=D21211<br>class=mRNAlike lncRNA<br>name=Human lncRNA<br>ref=JounralRNA<br>transcriptId=5112<br>cpcScore=16.5493000 cnci=-0.1473824            | NonCoding |
| TC09000358.hg.1 | 6.45                       | 5.59                            | PSAT1             | phosphoserine aminotransferase 1; NULL                                                                                                             | Coding    |
| TC04000469.hg.1 | 5.79                       | 5.49                            | PTPN13            | protein tyrosine phosphatase, non-receptor type 13 (APO-1/CD95 (Fas)-associated phosphatase); NULL                                                 | Coding    |
| TC05003094.hg.1 | 3.02                       | 4.84                            |                   | accn=AK123915<br>class=mRNAlike lncRNA<br>name=Human lncRNA<br>ref=JounralRNA<br>transcriptId=2971<br>cpcScore=-1.0632800 cnci=-0.2444438          | NonCoding |
| TC09000736.hg.1 | 5.3                        | 4.23                            | ASS1              | argininosuccinate synthase 1; NULL                                                                                                                 | Coding    |
| TC02001049.hg.1 | 7.35                       | 3.77                            | HOXD13            | homeobox D13; NULL                                                                                                                                 | Coding    |
| TC02001885.hg.1 | 2.88                       | 3.6                             | BCL11A            | B-cell CLL/lymphoma 11A (zinc finger protein); NULL                                                                                                | Coding    |
| TC15002604.hg.1 | 2.92                       | 3.38                            |                   | accn=BC040579<br>class=mRNAlike lncRNA<br>name=Human lncRNA<br>ref=JounralRNA<br>transcriptId=333 cpcScore=-0.5628490 cnci=-0.2538815  linc-TLE3-1 | NonCoding |

|                 |       |      |        |                                                                                                                                           |           |
|-----------------|-------|------|--------|-------------------------------------------------------------------------------------------------------------------------------------------|-----------|
|                 |       |      |        | chr15::-70863297-70878945                                                                                                                 |           |
| TC11001509.hg.1 | 2.57  | 3.32 | LGR4   | leucine-rich repeat containing G protein-coupled receptor 4; NULL                                                                         | Coding    |
| TC11002916.hg.1 | 6.45  | 3.31 |        | accn=BC040643<br>class=mRNALike lncRNA<br>name=Human lncRNA<br>ref=JounralRNA<br>transcriptId=3607<br>cpcScore=-1.0975300 cnci=-0.3162465 | NonCoding |
| TC07002265.hg.1 | 5.4   | 3.18 |        | accn=NULL class=lncRNA<br>name=<br>ref=EnsemblNoncode<br>transcriptId=ENST00000515771<br>cpcScore=0.0505312<br>cnci=-0.2863870            | NonCoding |
| TC16001124.hg.1 | 3.9   | 3.11 | IRX3   | iroquois homeobox 3; NULL                                                                                                                 | Coding    |
| TC17001727.hg.1 | 42.26 | 3.04 | MPO    | myeloperoxidase                                                                                                                           | Coding    |
| TC01000314.hg.1 | 3.76  | 3.03 | CLIC4  | chloride intracellular channel 4; NULL                                                                                                    | Coding    |
| TC02004620.hg.1 | 5.95  | 3.02 |        | accn=AF085983<br>class=mRNALike lncRNA<br>name=Human lncRNA<br>ref=JounralRNA<br>transcriptId=1403<br>cpcScore=-1.3254100 cnci=-0.3429003 | NonCoding |
| TC11002566.hg.1 | 3.07  | 2.95 |        | linc-CALCB-1<br>chr11:+:14934958-14969520                                                                                                 | NonCoding |
| TC01001172.hg.1 | 2.57  | 2.93 | FCGR1A | Fc fragment of IgG, high affinity Ia, receptor (CD64);<br>Fc fragment of IgG, high affinity Ib, receptor (CD64);<br>NULL                  | Coding    |
| TC02004536.hg.1 | 4.4   | 2.93 |        | accn=NULL class=lncRNA<br>name=<br>ref=UCSCGeneNoncode<br>transcriptId=uc002tmi.1<br>cpcScore=-0.4862480 cnci=-0.1784094                  | NonCoding |
| TC01001161.hg.1 | 2.35  | 2.76 | FCGR1C | Fc fragment of IgG, high affinity Ic, receptor (CD64),<br>pseudogene                                                                      | Coding    |
| TC09002619.hg.1 | 2.09  | 2.73 |        | accn=NR_037638<br>class=lncRNA name=                                                                                                      | NonCoding |

|                 |       |      |          |                                                                                                                                                         |           |
|-----------------|-------|------|----------|---------------------------------------------------------------------------------------------------------------------------------------------------------|-----------|
|                 |       |      |          | ref=RefGeneNoncode<br>transcriptId=NR_037638<br>cpcScore=7.7978900 cnci=-<br>0.2782276                                                                  |           |
| TC17002261.hg.1 | 6.71  | 2.69 |          | accn=AK095573<br>class=mRNALike lncRNA<br>name=Human lncRNA<br>ref=JounralRNA<br>transcriptId=3199<br>cpcScore=-0.8604430 cnci=-<br>0.2462343           | NonCoding |
| TC10000808.hg.1 | 6.77  | 2.67 | PDCD4    | programmed cell death 4<br>(neoplastic transformation<br>inhibitor); microRNA 4680;<br>NULL                                                             | Coding    |
| TC17001406.hg.1 | 2.45  | 2.54 | ACACA    | acetyl-CoA carboxylase<br>alpha; NULL                                                                                                                   | Coding    |
| TC13000738.hg.1 | 2.41  | 2.51 | TBC1D4   | TBC1 domain family,<br>member 4; NULL                                                                                                                   | Coding    |
| TC01005212.hg.1 | 4.01  | 2.5  |          | accn=NULL class=lncRNA<br>name=<br>ref=UCSCGeneNoncode<br>transcriptId=uc001aia.1<br>cpcScore=1.1647500 cnci=-<br>0.2131817                             | NonCoding |
| TC11003010.hg.1 | 4.16  | 2.47 |          | accn=NR_036542<br>class=lncRNA name=<br>ref=RefGeneNoncode<br>transcriptId=NR_036542<br>cpcScore=11.5355000 cnci=-<br>0.1951032                         | NonCoding |
| TC07000159.hg.1 | 2.54  | 2.45 | NFE2L3   | nuclear factor (erythroid-<br>derived 2)-like 3; NULL                                                                                                   | Coding    |
| TC01000494.hg.1 | 3.32  | 2.43 | KIAA0754 | KIAA0754                                                                                                                                                | Coding    |
| TC19002198.hg.1 | 6.66  | 2.41 |          | accn=BC000847<br>class=mRNALike lncRNA<br>name=NULL ref=H-<br>invitational v7.5<br>transcriptId=HIT000085900<br>cpcScore=-1.3886400 cnci=-<br>0.2095920 | NonCoding |
| TC07001230.hg.1 | 4.54  | 2.4  | HIBADH   | 3-hydroxyisobutyrate<br>dehydrogenase; NULL                                                                                                             | Coding    |
| TC02001145.hg.1 | -3.42 | 2.37 |          | [retired] ncrna:snoRNA<br>chromosome:GRCh37:2:198<br>266282:198266315:1<br>gene:ENSG00000238956                                                         | Coding    |

|                 |      |      |          |                                                                                                                                                                                                                                                                                                       |           |
|-----------------|------|------|----------|-------------------------------------------------------------------------------------------------------------------------------------------------------------------------------------------------------------------------------------------------------------------------------------------------------|-----------|
|                 |      |      |          | gene_biotype:snoRNA<br>transcript_biotype:snoRNA                                                                                                                                                                                                                                                      |           |
| TC15000028.hg.1 | 2.28 | 2.34 | CYFIP1   | cytoplasmic FMR1<br>interacting protein 1; NULL                                                                                                                                                                                                                                                       | Coding    |
| TC02000511.hg.1 | 7.16 | 2.32 | MAT2A    | methionine<br>adenosyltransferase II,<br>alpha; NULL                                                                                                                                                                                                                                                  | Coding    |
| TC10002884.hg.1 | 5.5  | 2.31 |          | accn=AF427341<br>class=mRNAlike lncRNA<br>name=NULL ref=H-<br>invitational v7.5<br>transcriptId=HIT000079492<br>cpcScore=1.0804600 cnci=-<br>0.3571220                                                                                                                                                | NonCoding |
| TC01004727.hg.1 | 3.05 | 2.3  |          | linc-PPIAL4A-11<br>chr1:+:149369293-<br>149378365 linc-PPIAL4A-11<br>chr1:+:149369293-<br>149378295 linc-PPIAL4A-11<br>chr1:+:149369293-<br>149370314 linc-PPIAL4A-11<br>chr1:+:149369308-<br>149379201 linc-PPIAL4A-11<br>chr1:+:149369359-<br>149375183 linc-PPIAL4A-11<br>chr1:+:149370546-1493752 | NonCoding |
| TC02002256.hg.1 | 5.11 | 2.27 | TMEM185B | transmembrane protein<br>185B                                                                                                                                                                                                                                                                         | Coding    |
| TC10001924.hg.1 | 2.3  | 2.23 |          | accn=NULL class=lncRNA<br>name=<br>ref=UCSCGeneNoncode<br>transcriptId=uc001iqe.2<br>cpcScore=-1.2488100 cnci=-<br>0.4433531                                                                                                                                                                          | NonCoding |
| TC20001302.hg.1 | 3.16 | 2.22 |          | accn=L17329<br>class=mRNAlike lncRNA<br>name=NULL ref=H-<br>invitational v7.5<br>transcriptId=HIT000192308<br>cpcScore=-1.3871500 cnci=-<br>0.3295578                                                                                                                                                 | NonCoding |
| TC17002479.hg.1 | 3.37 | 2.21 |          | accn=BC008968<br>class=mRNAlike lncRNA<br>name=NULL ref=H-<br>invitational v7.5<br>transcriptId=HIT000087180<br>cpcScore=4.1403600 cnci=-                                                                                                                                                             | NonCoding |



|                 |      |      |         |                                                                                                                                                                                                                                                                     |           |
|-----------------|------|------|---------|---------------------------------------------------------------------------------------------------------------------------------------------------------------------------------------------------------------------------------------------------------------------|-----------|
|                 |      |      |         | 0.2539072                                                                                                                                                                                                                                                           |           |
| TC02000997.hg.1 | 2.19 | 2.2  | MIR4774 | microRNA 4774                                                                                                                                                                                                                                                       | Coding    |
| TC11000571.hg.1 | 2.04 | 2.19 | LGALS12 | lectin, galactoside-binding, soluble, 12                                                                                                                                                                                                                            | Coding    |
| TC11001289.hg.1 | 2.85 | 2.18 | CARS    | cysteinyl-tRNA synthetase; NULL                                                                                                                                                                                                                                     | Coding    |
| TC01004621.hg.1 | 2.16 | 2.17 |         | accn=NULL class=lncRNA name= ref=UCSCGeneNoncode transcriptId=uc001ebn.1 cpcScore=0.2273310 cnci=-0.3693695                                                                                                                                                         | NonCoding |
| TC03002275.hg.1 | 2.34 | 2.16 |         | accn=AK027235 class=mRNAlike lncRNA name=Human lncRNA ref=JounralRNA transcriptId=1719 cpcScore=-0.6843180 cnci=-0.3290836                                                                                                                                          | NonCoding |
| TC06002723.hg.1 | 2.14 | 2.16 |         | accn=NR_037861 class=lncRNA name= ref=RefGeneNoncode transcriptId=NR_037861 cpcScore=4.9579600 cnci=-0.1227873   accn=NR_037860 class=lncRNA name= ref=RefGeneNoncode transcriptId=NR_037860 cpcScore=3.1905200 cnci=-0.1085205                                     | NonCoding |
| TC20000603.hg.1 | 2.14 | 2.16 | FERMT1  | fermitin family member 1; NULL                                                                                                                                                                                                                                      | Coding    |
| TC11002205.hg.1 | 3.69 | 2.15 | SESN3   | sestrin 3                                                                                                                                                                                                                                                           | Coding    |
| TC02003715.hg.1 | 4.57 | 2.13 |         | accn=NULL class=lncRNA name= ref=UCSCGeneNoncode transcriptId=uc002umb.1 cpcScore=-1.2398600 cnci=-0.1985030   accn=NULL class=lncRNA name= ref=EnsemblNoncode transcriptId=ENST00000420672 cpcScore=-1.0201700 cnci=-0.2972254   accn=NULL class=lncRNA name= ref= | NonCoding |
| TC01005886.hg.1 | 2.19 | 2.11 |         | accn=BC039426                                                                                                                                                                                                                                                       | NonCoding |

|                 |       |       |         |                                                                                                                                                  |           |
|-----------------|-------|-------|---------|--------------------------------------------------------------------------------------------------------------------------------------------------|-----------|
|                 |       |       |         | class=mRNALike lncRNA<br>name=Human lncRNA<br>ref=JounralRNA<br>transcriptId=691 cpcScore=-<br>0.9137190 cnci=-0.3550853                         |           |
| TC07002895.hg.1 | 12.38 | 2.11  |         | accn=NULL class=lncRNA<br>name=<br>ref=UCSCGeneNoncode<br>transcriptId=uc003tgl.1<br>cpcScore=0.4327350 cnci=-<br>0.0487903                      | NonCoding |
| TC01003949.hg.1 | 8.33  | 2.09  | ABCB10  | ATP-binding cassette, sub-<br>family B (MDR/TAP),<br>member 10; NULL                                                                             | Coding    |
| TC07003326.hg.1 | 3.35  | 2.06  | GBAS    | glioblastoma amplified<br>sequence; NULL                                                                                                         | Coding    |
| TC11001107.hg.1 | 2.5   | 2.05  | SORL1   | sortilin-related receptor,<br>L(DLR class) A repeats<br>containing                                                                               | Coding    |
| TC22000381.hg.1 | 4.25  | 2.05  |         | DQ586951,uc021wrj.1                                                                                                                              | Coding    |
| TC06002106.hg.1 | 2.48  | 2.04  | EPB41L2 | erythrocyte membrane<br>protein band 4.1-like 2;<br>NULL                                                                                         | Coding    |
| TC09001547.hg.1 | 3.76  | 2.03  | STOM    | stomatin; NULL                                                                                                                                   | Coding    |
| TC08000749.hg.1 | 4.28  | 2.01  | MYC     | v-myc myelocytomatosis<br>viral oncogene homolog<br>(avian); NULL                                                                                | Coding    |
| TC16001234.hg.1 | 2.73  | 2.01  | AARS    | alanyl-tRNA synthetase                                                                                                                           | Coding    |
| TC06002149.hg.1 | -3.47 | -2.01 | NHEG1   | neuroblastoma highly<br>expressed 1; NULL                                                                                                        | Coding    |
| TC09001935.hg.1 | -6.46 | -2.01 |         | linc-CNTNAP3B-3<br>chr9:+:42858151-42893135                                                                                                      | NonCoding |
| TC11001673.hg.1 | -2.96 | -2.01 |         | DQ595836,uc001nap.1                                                                                                                              | Coding    |
| TC11001680.hg.1 | -4.38 | -2.01 |         | DQ589460,uc010rgf.2                                                                                                                              | Coding    |
| TC12000236.hg.1 | -5.56 | -2.01 |         | cdna:known<br>chromosome:GRCh37:12:21<br>980144:22040891:1<br>gene:ENSG00000257022<br>gene_biotype:antisense<br>transcript_biotype:antisens<br>e | Coding    |
| TC20001157.hg.1 | -3.12 | -2.01 |         | accn=FJ895880<br>class=mRNALike lncRNA<br>name=NULL ref=H-<br>invitational v7.5<br>transcriptId=HIT000558989<br>cpcScore=0.7996950 cnci=-        | NonCoding |

|                 |       |       |                   |                                                                                                                                                        |           |
|-----------------|-------|-------|-------------------|--------------------------------------------------------------------------------------------------------------------------------------------------------|-----------|
|                 |       |       |                   | 0.2204562                                                                                                                                              |           |
| TC03001108.hg.1 | -5.29 | -2.02 |                   | BC040733,uc021xjv.1                                                                                                                                    | Coding    |
| TC07002244.hg.1 | -3.69 | -2.02 |                   | linc-BMPER<br>chr7:+:33900207-33917087                                                                                                                 | NonCoding |
| TC09000278.hg.1 | -5.44 | -2.02 |                   | ENSG00000256208,ENST0000542122.1                                                                                                                       | Coding    |
| TC09000305.hg.1 | -6.04 | -2.02 |                   | ENSG00000255706,ENST0000537313.1                                                                                                                       | Coding    |
| TC01006262.hg.1 | -2.91 | -2.03 |                   | accn=AF399612<br>class=mRNAlike lncRNA<br>name=NULL ref=H-<br>invitational v7.5<br>transcriptId=HIT000384019<br>cpcScore=5.0364600 cnci=-<br>0.0404239 | NonCoding |
| TC05002898.hg.1 | -3.26 | -2.03 |                   | accn=AF056420<br>class=mRNAlike lncRNA<br>name=Human lncRNA<br>ref=JounralRNA<br>transcriptId=2865<br>cpcScore=1.6195100 cnci=-<br>0.1488856           | NonCoding |
| TC07003153.hg.1 | -3.16 | -2.03 |                   | accn=NULL class=mRNAlike<br>lncRNA name=vega lncRNA<br>ref=Gencode<br>transcriptId=OTTHUMT0000<br>0141831 cpcScore=-<br>0.5360430 cnci=-0.3446831      | NonCoding |
| TC08000450.hg.1 | -2.84 | -2.03 |                   | ncrna:miRNA<br>chromosome:GRCh37:8:686<br>23867:68623958:1<br>gene:ENSG00000221660<br>gene_biotype:miRNA<br>transcript_biotype:miRNA                   | Coding    |
| TC11002671.hg.1 | -5.7  | -2.03 |                   | accn=X64990<br>class=mRNAlike lncRNA<br>name=Human lncRNA<br>ref=JounralRNA<br>transcriptId=5265<br>cpcScore=1.2101900 cnci=-<br>0.3632053             | NonCoding |
| TC13000252.hg.1 | -4.72 | -2.03 | OTTHUMG0000017023 | NULL                                                                                                                                                   | Coding    |
| TC19000160.hg.1 | -3.47 | -2.03 |                   | [retired] ncrna:lincRNA<br>chromosome:GRCh37:19:96<br>49409:9650402:1<br>gene:ENSG00000247585                                                          | Coding    |

|                 |       |       |                        |                                                                                                                                                                                                                                |           |
|-----------------|-------|-------|------------------------|--------------------------------------------------------------------------------------------------------------------------------------------------------------------------------------------------------------------------------|-----------|
| TC21000877.hg.1 | -5.14 | -2.03 |                        | linc-TMPRSS15-15 chr21:-<br>:26258989-26275070                                                                                                                                                                                 | NonCoding |
| TC05001948.hg.1 | -4.5  | -2.04 | OTTHUMG00<br>000164977 | NULL                                                                                                                                                                                                                           | Coding    |
| TC10000590.hg.1 | -4.18 | -2.04 |                        | ncrna:snRNA<br>chromosome:GRCh37:10:85<br>763088:85763235:1<br>gene:ENSG00000200789<br>gene_biotype:snRNA<br>transcript_biotype:snRNA                                                                                          | Coding    |
| TC14001601.hg.1 | -8.32 | -2.04 |                        | linc-DHRS2-1<br>chr14:+:24096369-<br>24096959                                                                                                                                                                                  | NonCoding |
| TC01000921.hg.1 | -7.29 | -2.05 | AMY1B                  | amylase, alpha 1B (salivary);<br>amylase, alpha 1C (salivary);<br>amylase, alpha 1A (salivary);<br>NULL                                                                                                                        | Coding    |
| TC02004912.hg.1 | -4.52 | -2.05 |                        | linc-PDCD1-3 chr2:-<br>:242961959-<br>242968317 linc-PDCD1-3<br>chr2:-:242967333-<br>242968327                                                                                                                                 | NonCoding |
| TC05001189.hg.1 | -2.52 | -2.05 | FTH1P3                 | ferritin, heavy polypeptide 1<br>pseudogene 3                                                                                                                                                                                  | Coding    |
| TC07003110.hg.1 | -4.08 | -2.05 |                        | linc-C7orf66-3 chr7:-<br>:109162037-109237223                                                                                                                                                                                  | NonCoding |
| TC12002787.hg.1 | -2.41 | -2.05 |                        | linc-PLCZ1-4 chr12:-<br>:20387840-20417097                                                                                                                                                                                     | NonCoding |
| TC02003420.hg.1 | -4.66 | -2.06 |                        | accn=NULL class=lincRNA<br>name=Human lincRNA<br>ref=Scripture<br>Reconstruction LincRNAs By<br>Luo<br>transcriptId=linc_luo_1936<br>cpcScore=-1.4988900 cnci=-<br>0.1588102 linc-LOC285033-<br>4 chr2:+:96477741-<br>96479705 | NonCoding |
| TC03000780.hg.1 | -4.6  | -2.06 | SLC9A9-AS2             | SLC9A9 antisense RNA 2;<br>NULL                                                                                                                                                                                                | Coding    |
| TC08002109.hg.1 | -6.72 | -2.06 |                        | accn=NULL class=lincRNA<br>name=Human lincRNA<br>ref=Scripture<br>Reconstruction LincRNAs By<br>Luo<br>transcriptId=linc_luo_1451<br>cpcScore=-1.3778800 cnci=-                                                                | NonCoding |

|                 |        |       |            |                                                                                                                                                                                                                                                                                                         |           |
|-----------------|--------|-------|------------|---------------------------------------------------------------------------------------------------------------------------------------------------------------------------------------------------------------------------------------------------------------------------------------------------------|-----------|
|                 |        |       |            | 0.2708561                                                                                                                                                                                                                                                                                               |           |
| TC09001709.hg.1 | -5.13  | -2.06 | MIR3689F   | microRNA 3689f                                                                                                                                                                                                                                                                                          | Coding    |
| TC12001808.hg.1 | -3.91  | -2.06 |            | ncrna:misc_RNA<br>chromosome:GRCh37:12:92564129:92564229:-1<br>gene:ENSG00000199895<br>gene_biotype:misc_RNA<br>transcript_biotype:misc_RNA                                                                                                                                                             | Coding    |
| TC02003400.hg.1 | -4.05  | -2.07 |            | accn=Z69008<br>class=mRNAlike lncRNA<br>name=NULL ref=H-<br>invitational v7.5<br>transcriptId=HIT000327645_03<br>cpcScore=2.1100800<br>cnci=-0.2912141   accn=Z68955<br>class=mRNAlike lncRNA<br>name=NULL ref=H-<br>invitational v7.5<br>transcriptId=HIT000327592_03<br>cpcScore=2.2525300<br>cnci=-0 | NonCoding |
| TC02003448.hg.1 | -4.14  | -2.07 |            | accn=NULL class=mRNAlike<br>lncRNA name=vega lncRNA<br>ref=Gencode<br>transcriptId=OTTHUMT00000329516<br>cpcScore=-1.1853900<br>cnci=-0.2758929                                                                                                                                                         | NonCoding |
| TC02004595.hg.1 | -4.43  | -2.07 |            | linc-C2orf27B-5 chr2:-<br>:132889689-132893383                                                                                                                                                                                                                                                          | NonCoding |
| TC06002303.hg.1 | -3.68  | -2.07 |            | ncrna:miRNA<br>chromosome:GRCh37:6:166355759:166355829:-1<br>gene:ENSG00000252196<br>gene_biotype:miRNA<br>transcript_biotype:miRNA                                                                                                                                                                     | Coding    |
| TC0X002055.hg.1 | -5.27  | -2.07 |            | accn=NULL class=mRNAlike<br>lncRNA name=vega lncRNA<br>ref=Gencode<br>transcriptId=OTTHUMT00000056483<br>cpcScore=-1.1776400<br>cnci=-0.1236370                                                                                                                                                         | NonCoding |
| TC15000079.hg.1 | -10.32 | -2.07 | SNORD115-5 | small nucleolar RNA, C/D<br>box 115-5; small nucleolar<br>RNA, C/D box 115-9                                                                                                                                                                                                                            | Coding    |
| TC15000082.hg.1 | -10.32 | -2.07 | SNORD115-  | small nucleolar RNA, C/D                                                                                                                                                                                                                                                                                | Coding    |



|                 |        |       |                   |                                                                                                                                                    |           |
|-----------------|--------|-------|-------------------|----------------------------------------------------------------------------------------------------------------------------------------------------|-----------|
|                 |        |       | 12                | box 115-12; small nucleolar RNA, C/D box 115-9                                                                                                     |           |
| TC15000084.hg.1 | -10.31 | -2.07 | SNORD115-11       | small nucleolar RNA, C/D box 115-11; small nucleolar RNA, C/D box 115-43; small nucleolar RNA, C/D box 115-36; small nucleolar RNA, C/D box 115-29 | Coding    |
| TC15000085.hg.1 | -10.32 | -2.07 | SNORD115-12       | small nucleolar RNA, C/D box 115-12; small nucleolar RNA, C/D box 115-9                                                                            | Coding    |
| TC15000099.hg.1 | -10.31 | -2.07 | SNORD115-43       | small nucleolar RNA, C/D box 115-43; small nucleolar RNA, C/D box 115-36; small nucleolar RNA, C/D box 115-29; small nucleolar RNA, C/D box 115-11 | Coding    |
| TC15000105.hg.1 | -10.31 | -2.07 | SNORD115-43       | small nucleolar RNA, C/D box 115-43; small nucleolar RNA, C/D box 115-36; small nucleolar RNA, C/D box 115-29; small nucleolar RNA, C/D box 115-11 | Coding    |
| TC15000112.hg.1 | -10.31 | -2.07 | SNORD115-43       | small nucleolar RNA, C/D box 115-43; small nucleolar RNA, C/D box 115-36; small nucleolar RNA, C/D box 115-29; small nucleolar RNA, C/D box 115-11 | Coding    |
| TC01000307.hg.1 | -2.38  | -2.08 | OTTHUMG0000003037 | NULL                                                                                                                                               | Coding    |
| TC01005778.hg.1 | -5.42  | -2.08 |                   | accn=NULL class=IncRNA name= ref=UCSCGeneNoncode transcriptId=uc001eng.1 cpcScore=0.1574640 cnci=-0.2691133                                        | NonCoding |
| TC02002932.hg.1 | -3.12  | -2.08 | OR6B3             | olfactory receptor, family 6, subfamily B, member 3; NULL                                                                                          | Coding    |
| TC02003970.hg.1 | -3.65  | -2.08 |                   | accn=NULL class=mRNALike lncRNA name=vega lncRNA ref=GENCODE transcriptId=OTTHUMT00000322440 cpcScore=-1.1150400 cnci=-0.2497148                   | NonCoding |
| TC05001719.hg.1 | -4.44  | -2.08 | MGC32805          | uncharacterized                                                                                                                                    | Coding    |

|                 |        |       |                        |                                                                                                                                                   |           |
|-----------------|--------|-------|------------------------|---------------------------------------------------------------------------------------------------------------------------------------------------|-----------|
|                 |        |       |                        | LOC153163; NULL                                                                                                                                   |           |
| TC07002969.hg.1 | -2.34  | -2.08 |                        | linc-ZNF479-11 chr7:-<br>:57469683-57472194                                                                                                       | NonCoding |
| TC11001646.hg.1 | -4.01  | -2.08 |                        | DQ594870,uc001mzz.2                                                                                                                               | Coding    |
| TC12001449.hg.1 | -3.38  | -2.08 |                        | [retired] ncrna:miRNA<br>chromosome:GRCh37:12:48<br>876841:48876921:-1<br>gene:ENSG00000221171<br>gene_biotype:miRNA<br>transcript_biotype:miRNA  | Coding    |
| TC17000414.hg.1 | -5.49  | -2.09 |                        | DQ575686,uc021tvc.1                                                                                                                               | Coding    |
| TC17000421.hg.1 | -5.49  | -2.09 |                        | DQ575686,uc021tvf.1                                                                                                                               | Coding    |
| TC17000428.hg.1 | -5.49  | -2.09 |                        | DQ575686,uc002hmi.3                                                                                                                               | Coding    |
| TC17000434.hg.1 | -5.49  | -2.09 |                        | DQ575686,uc002hmq.3                                                                                                                               | Coding    |
| TC17000457.hg.1 | -5.49  | -2.09 |                        | DQ575686,uc002hpu.3                                                                                                                               | Coding    |
| TC17000734.hg.1 | -5.49  | -2.09 |                        | DQ575686,uc021uay.1                                                                                                                               | Coding    |
| TC17001414.hg.1 | -5.49  | -2.09 |                        | DQ587906,uc002hor.3                                                                                                                               | Coding    |
| TC17002510.hg.1 | -5.21  | -2.09 |                        | accn=NULL class=mRNAlike<br>lncRNA name=vega lncRNA<br>ref=Gencode<br>transcriptId=OTTHUMT0000<br>0131039 cpcScore=-<br>0.2197860 cnci=-0.2135483 | NonCoding |
| TC18000363.hg.1 | -3.84  | -2.09 |                        | DQ600844,uc002kpv.1                                                                                                                               | Coding    |
| TC03002148.hg.1 | -5.27  | -2.1  |                        | BC053580,uc011bta.1                                                                                                                               | Coding    |
| TC09001920.hg.1 | -5.51  | -2.1  |                        | linc-FAM75A3-2<br>chr9:+:40308215-<br>40322860 linc-FAM75A3-2<br>chr9:+:40308742-40324812                                                         | NonCoding |
| TC15000094.hg.1 | -10.05 | -2.1  | SNORD115-<br>22        | small nucleolar RNA, C/D<br>box 115-22                                                                                                            | Coding    |
| TC17002014.hg.1 | -4.49  | -2.1  |                        | accn=NR_033795<br>class=lncRNA name=<br>ref=RefGeneNoncode<br>transcriptId=NR_033795<br>cpcScore=4.7796000 cnci=-<br>0.0475037                    | NonCoding |
| TC06002340.hg.1 | -4.82  | -2.11 | OTTHUMG00<br>000016072 | NULL                                                                                                                                              | Coding    |
| TC17000313.hg.1 | -4.18  | -2.11 |                        | DQ586005,uc021tth.1                                                                                                                               | Coding    |
| TC02000730.hg.1 | -7.31  | -2.12 | FAM138B                | family with sequence<br>similarity 138, member B;<br>family with sequence<br>similarity 138, member D;<br>NULL                                    | Coding    |
| TC16000375.hg.1 | -2.89  | -2.12 | ITGAX                  | integrin, alpha X<br>(complement component 3                                                                                                      | Coding    |

|                 |       |       |                        |                                                                                                                                                      |           |
|-----------------|-------|-------|------------------------|------------------------------------------------------------------------------------------------------------------------------------------------------|-----------|
|                 |       |       |                        | receptor 4 subunit); NULL                                                                                                                            |           |
| TC02003395.hg.1 | -5.75 | -2.13 |                        | accn=X72451<br>class=mRNALike lncRNA<br>name=NULL ref=H-<br>invitational v7.5<br>transcriptId=HIT000323293<br>cpcScore=2.3912500 cnci=-<br>0.1347265 | NonCoding |
| TC04002904.hg.1 | -5.27 | -2.13 |                        | linc-TRIML2-6 chr4:-<br>:190598434-190600102                                                                                                         | NonCoding |
| TC07002689.hg.1 | -6.12 | -2.13 |                        | linc-DPP6-2<br>chr7:+:153119375-<br>153120601                                                                                                        | NonCoding |
| TC09000771.hg.1 | -4.55 | -2.13 |                        | ncrna:misc_RNA<br>chromosome:GRCh37:9:136<br>177953:136178046:1<br>gene:ENSG00000201843<br>gene_biotype:misc_RNA<br>transcript_biotype:misc_RN<br>A  | Coding    |
| TC10001166.hg.1 | -2.03 | -2.13 | NRP1                   | neuropilin 1; NULL                                                                                                                                   | Coding    |
| TC15002068.hg.1 | -6.09 | -2.13 |                        | linc-GOLGA6L1-1<br>chr15:+:22512032-<br>22512452                                                                                                     | NonCoding |
| TC22000007.hg.1 | -9.04 | -2.13 | LOC1005080<br>46       | uncharacterized<br>LOC100508046; NULL                                                                                                                | Coding    |
| TC01002058.hg.1 | -5    | -2.14 | OTTHUMG00<br>000002855 | NULL                                                                                                                                                 | Coding    |
| TC03002939.hg.1 | -3.78 | -2.14 |                        | accn=NULL class=lncRNA<br>name=<br>ref=UCSCGeneNoncode<br>transcriptId=uc011bfh.1<br>cpcScore=1.6423300 cnci=-<br>0.2776299                          | NonCoding |
| TC0X000833.hg.1 | -9.45 | -2.14 |                        | DQ595787,uc004csk.3                                                                                                                                  | Coding    |
| TC0X000836.hg.1 | -9.45 | -2.14 |                        | DQ595787,uc011mhx.2                                                                                                                                  | Coding    |
| TC0X000838.hg.1 | -9.45 | -2.14 |                        | DQ595787,uc022bsm.1                                                                                                                                  | Coding    |
| TC0X000843.hg.1 | -9.45 | -2.14 |                        | DQ595787,uc011mia.2                                                                                                                                  | Coding    |
| TC0X000844.hg.1 | -9.45 | -2.14 |                        | DQ595787,uc011mib.2                                                                                                                                  | Coding    |
| TC0X000846.hg.1 | -9.45 | -2.14 |                        | DQ595787,uc022bsp.1                                                                                                                                  | Coding    |
| TC0X000848.hg.1 | -9.45 | -2.14 |                        | DQ595787,uc022bsr.1                                                                                                                                  | Coding    |
| TC22001200.hg.1 | -7.5  | -2.14 |                        | linc-MICAL3-2 chr22:-<br>:18660804-18688682 linc-<br>MICAL3-2 chr22:-<br>:18660804-18685242                                                          | NonCoding |
| TC02000623.hg.1 | -3.36 | -2.15 | IL18RAP                | interleukin 18 receptor<br>accessory protein; NULL                                                                                                   | Coding    |

|                 |       |       |                    |                                                                                                                                                                                                                                                                |           |
|-----------------|-------|-------|--------------------|----------------------------------------------------------------------------------------------------------------------------------------------------------------------------------------------------------------------------------------------------------------|-----------|
| TC0400999.hg.1  | -6.54 | -2.15 | MIR378D1           | microRNA 378d-1                                                                                                                                                                                                                                                | Coding    |
| TC08000001.hg.1 | -4.63 | -2.15 | OTTHUMG00000163939 | NULL                                                                                                                                                                                                                                                           | Coding    |
| TC02000559.hg.1 | -5.55 | -2.16 | IGKV3D-7           | immunoglobulin kappa variable 3D-7; NULL                                                                                                                                                                                                                       | Coding    |
| TC03002147.hg.1 | -6.47 | -2.16 |                    | BC044310,uc011bsy.2                                                                                                                                                                                                                                            | Coding    |
| TC06001823.hg.1 | -4.4  | -2.16 | OTTHUMG0000014898  | NULL                                                                                                                                                                                                                                                           | Coding    |
| TC08000130.hg.1 | -3.46 | -2.16 | RNA5SP256          | RNA, 5S ribosomal pseudogene 256                                                                                                                                                                                                                               | Coding    |
| TC09000861.hg.1 | -5.7  | -2.16 | OTTHUMG0000021018  | NULL                                                                                                                                                                                                                                                           | Coding    |
| TC10002919.hg.1 | -9.8  | -2.16 |                    | accn=NULL class=lincRNA name=Human lincRNA ref=Scripture Reconstruction LincRNAs By Luo transcriptId=linc_luo_1386 cpcScore=-1.4896900 cnci=-0.2016896 linc-C10orf93-1 chr10:-:134824439-134825072 linc-C10orf93-1 chr10:-:134824448-134825220 linc-C10orf93-1 | NonCoding |
| TC14000705.hg.1 | -4.35 | -2.16 | SNORD114-25        | small nucleolar RNA, C/D box 114-25                                                                                                                                                                                                                            | Coding    |
| TC18000333.hg.1 | -3.11 | -2.16 |                    | DQ582047,uc021uha.1                                                                                                                                                                                                                                            | Coding    |
| TC08002172.hg.1 | -6.4  | -2.17 |                    | linc-ERICH1-7 chr8:-:1236402-1237027 linc-ERICH1-7 chr8:-:1236493-1237155 linc-ERICH1-7 chr8:-:1236612-1237971 linc-ERICH1-7 chr8:-:1236703-1237178 linc-ERICH1-7 chr8:-:1236887-1237155                                                                       | NonCoding |
| TC14001575.hg.1 | -4.99 | -2.17 |                    | accn=NULL class=lncRNA name= ref=EnsemblNoncode transcriptId=ENST00000547584 cpcScore=-1.1980100 cnci=-0.3683500                                                                                                                                               | NonCoding |
| TC04002491.hg.1 | -3.53 | -2.18 |                    | accn=BC015108 class=mRNAlike lncRNA name=Human lncRNA ref=JounralRNA transcriptId=2339                                                                                                                                                                         | NonCoding |

|                 |       |       |                   |                                                                                                                                    |           |
|-----------------|-------|-------|-------------------|------------------------------------------------------------------------------------------------------------------------------------|-----------|
|                 |       |       |                   | cpcScore=-1.1526500 cnci=-0.2173938 linc-GPR125-2 chr4:-:23724884-23735202 linc-GPR125-2 chr4:-:23730408-23735559                  |           |
| TCOX000603.hg.1 | -4.15 | -2.18 | OTTHUMG0000022331 | NULL                                                                                                                               | Coding    |
| TC02004202.hg.1 | -3.31 | -2.19 |                   | linc-LRPPRC-1 chr2:-:44286098-44294916                                                                                             | NonCoding |
| TCOX001857.hg.1 | -3.05 | -2.19 |                   | linc-THOC2-AS chrX:+:122867023-122868144                                                                                           | NonCoding |
| TC12000478.hg.1 | -4.24 | -2.19 | OR6C3             | olfactory receptor, family 6, subfamily C, member 3                                                                                | Coding    |
| TC02003520.hg.1 | -8.88 | -2.2  |                   | linc-RABL2A-1 chr2:+:114334958-114336486 linc-RABL2A-1 chr2:+:114334958-114336428                                                  | NonCoding |
| TC03001759.hg.1 | -2.48 | -2.2  | FTH1P4            | ferritin, heavy polypeptide 1 pseudogene 4                                                                                         | Coding    |
| TC12002388.hg.1 | -3.35 | -2.2  |                   | accn=U88357 class=mRNAlike lincRNA name=NULL ref=H-invitational v7.5 transcriptId=HIT000222077 cpcScore=0.4891320 cnci=-0.2568067  | NonCoding |
| TC02001926.hg.1 | -4.61 | -2.21 |                   | ncrna:misc_RNA chromosome:GRCh37:2:65782566:65782668:-1 gene:ENSG00000251900 gene_biotype:misc_RNA transcript_biotype:misc_RNA     | Coding    |
| TC10000605.hg.1 | -4.93 | -2.21 | RNA5SP322         | RNA, 5S ribosomal pseudogene 322                                                                                                   | Coding    |
| TC10001942.hg.1 | -2.8  | -2.21 |                   | accn=NULL class=mRNAlike lincRNA name=vega lincRNA ref=Gencode transcriptId=OTTHUMT00000047252 cpcScore=-1.1365300 cnci=-0.1967077 | NonCoding |
| TC13001093.hg.1 | -4.1  | -2.21 |                   | accn=NULL class=lincRNA name=Human lincRNA ref=Scripture Reconstruction LincRNAs By                                                | NonCoding |

|                 |        |       |                        |                                                                                                                                                      |           |
|-----------------|--------|-------|------------------------|------------------------------------------------------------------------------------------------------------------------------------------------------|-----------|
|                 |        |       |                        | Luo<br>transcriptId=linc_luo_257<br>cpcScore=-1.4103200 cnci=-<br>0.2829408                                                                          |           |
| TC03001171.hg.1 | -4.49  | -2.22 | RNA5SP123              | RNA, 5S ribosomal<br>pseudogene 123                                                                                                                  | Coding    |
| TC0X001962.hg.1 | -4.52  | -2.22 |                        | linc-PRKX-3 chrX:-:4545240-<br>4551613                                                                                                               | NonCoding |
| TC13000405.hg.1 | -6.14  | -2.22 |                        | ncrna:snoRNA<br>chromosome:GRCh37:13:11<br>2706392:112706452:1<br>gene:ENSG00000200072<br>gene_biotype:snoRNA<br>transcript_biotype:snoRNA           | Coding    |
| TC19002237.hg.1 | -4.41  | -2.22 |                        | accn=X90753<br>class=mRNAlike lncRNA<br>name=NULL ref=H-<br>invitational v7.5<br>transcriptId=HIT000324414<br>cpcScore=0.9822840 cnci=-<br>0.1848652 | NonCoding |
| TC05003051.hg.1 | -10.29 | -2.23 |                        | accn=NULL class=lncRNA<br>name=<br>ref=UCSCGeneNoncode<br>transcriptId=uc003jxs.3<br>cpcScore=1.5112400 cnci=-<br>0.2519878                          | NonCoding |
| TC06002110.hg.1 | -7.84  | -2.23 | OR2A4                  | olfactory receptor, family 2,<br>subfamily A, member 4;<br>NULL                                                                                      | Coding    |
| TC08000679.hg.1 | -4.97  | -2.23 | OTTHUMG00<br>000164897 | NULL                                                                                                                                                 | Coding    |
| TC04002398.hg.1 | -5.44  | -2.24 |                        | linc-FRG1-1<br>chr4:+:190802232-<br>190806061 linc-FRG1-1<br>chr4:+:190802669-<br>190806023                                                          | NonCoding |
| TC05001446.hg.1 | -10.2  | -2.24 |                        | DQ575504,uc003jxs.4                                                                                                                                  | Coding    |
| TC05002798.hg.1 | -5.89  | -2.24 |                        | linc-SLC9A3-1 chr5:-<br>:553526-554002                                                                                                               | NonCoding |
| TC08000916.hg.1 | -7.04  | -2.25 | LINC00965              | long intergenic non-protein<br>coding RNA 965                                                                                                        | Coding    |
| TC01001150.hg.1 | -9.25  | -2.26 | OTTHUMG00<br>000040701 | NULL                                                                                                                                                 | Coding    |
| TC19002432.hg.1 | -5.54  | -2.26 |                        | linc-UQCRFS1-2 chr19:-<br>:30186599-30187171                                                                                                         | NonCoding |
| TC08000534.hg.1 | -7.66  | -2.27 |                        | [retired] ncrna:lincRNA                                                                                                                              | Coding    |

|                 |        |       |                   |                                                                                                                                                              |           |
|-----------------|--------|-------|-------------------|--------------------------------------------------------------------------------------------------------------------------------------------------------------|-----------|
|                 |        |       |                   | chromosome:GRCh37:8:86776895:86804123:1<br>gene:ENSG00000250531                                                                                              |           |
| TC02001429.hg.1 | -3.62  | -2.28 |                   | ncrna:miRNA<br>chromosome:GRCh37:2:236235002:236235095:1<br>gene:ENSG00000216002<br>gene_biotype:miRNA<br>transcript_biotype:miRNA                           | Coding    |
| TC09001559.hg.1 | -4.54  | -2.28 | OR1N1             | olfactory receptor, family 1, subfamily N, member 1; NULL                                                                                                    | Coding    |
| TC11000115.hg.1 | -3.81  | -2.28 | OR52B6            | olfactory receptor, family 52, subfamily B, member 6; NULL                                                                                                   | Coding    |
| TC15001873.hg.1 | -3.8   | -2.28 |                   | DQ601487,uc021suq.1                                                                                                                                          | Coding    |
| TC22000518.hg.1 | -6.51  | -2.28 | LOC729461         | uncharacterized LOC729461; uncharacterized LOC642633; NULL                                                                                                   | Coding    |
| TC19001246.hg.1 | -6.75  | -2.3  |                   | cdna:pseudogene<br>chromosome:GRCh37:19:14974598:14975527:-1<br>gene:ENSG00000172148<br>gene_biotype:pseudogene<br>transcript_biotype:unprocessed_pseudogene | Coding    |
| TC07002496.hg.1 | -12.81 | -2.31 |                   | accn=AF016693<br>class=mRNAlike lncRNA<br>name=NULL ref=H-invitational v7.5<br>transcriptId=HIT000062404<br>cpcScore=2.2948300 cnci=-0.1207372               | NonCoding |
| TC19000120.hg.1 | -5.12  | -2.31 | EMR1              | egf-like module containing, mucin-like, hormone receptor-like 1                                                                                              | Coding    |
| TC07000757.hg.1 | -5.44  | -2.32 | OTTHUMG0000157151 | NULL                                                                                                                                                         | Coding    |
| TC22000534.hg.1 | -11.66 | -2.32 | OTTHUMG0000150794 | NULL                                                                                                                                                         | Coding    |
| TC02004483.hg.1 | -7.97  | -2.33 |                   | accn=NULL class=mRNAlike lncRNA name=vega lncRNA ref=GENCODE<br>transcriptId=OTTHUMT00000329963 cpcScore=-1.0952600 cnci=-0.1940687                          | NonCoding |

|                 |        |       |                   |                                                                                                                                                                                                                                        |           |
|-----------------|--------|-------|-------------------|----------------------------------------------------------------------------------------------------------------------------------------------------------------------------------------------------------------------------------------|-----------|
| TC10000958.hg.1 | -11.29 | -2.33 |                   | [retired] havana:lincRNA<br>chromosome:GRCh37:10:60001:60544:-1<br>gene:ENSG00000224285<br>gene_biotype:lincRNA<br>transcript_biotype:lincRNA <br>[retired] cdna:all<br>chromosome:VEGA50:10:60001:60544:-1<br>Gene:OTTHUMG00000017523 | Coding    |
| TC19001244.hg.1 | -5.74  | -2.33 | OR7A5             | olfactory receptor, family 7, subfamily A, member 5                                                                                                                                                                                    | Coding    |
| TC01003067.hg.1 | -15.63 | -2.34 | OTTHUMG0000085417 | NULL                                                                                                                                                                                                                                   | Coding    |
| TC08000034.hg.1 | -8.22  | -2.34 | USP17L1P          | NULL                                                                                                                                                                                                                                   | Coding    |
| TC0X001908.hg.1 | -2.28  | -2.34 |                   | linc-AFF2<br>chrX:+:147133552-147134419 linc-AFF2<br>chrX:+:147133558-147134430                                                                                                                                                        | NonCoding |
| TC11003421.hg.1 | -3.34  | -2.34 |                   | linc-SNX19 chr11:-:130949312-130953304                                                                                                                                                                                                 | NonCoding |
| TC06003051.hg.1 | -4.86  | -2.39 |                   | linc-TAAR9-3<br>chr6:+:132223102-132241705 linc-TAAR9-3<br>chr6:+:132223103-132228670 linc-TAAR9-3<br>chr6:+:132224787-132228670                                                                                                       | NonCoding |
| TC15000015.hg.1 | -6.9   | -2.39 |                   | DQ582260,uc001yts.3                                                                                                                                                                                                                    | Coding    |
| TC19000264.hg.1 | -6.58  | -2.39 | OR7C2             | olfactory receptor, family 7, subfamily C, member 2                                                                                                                                                                                    | Coding    |
| TC02002994.hg.1 | -12.34 | -2.4  |                   | accn=NULL class=lincRNA<br>name=Human lincRNA<br>ref=Scripture<br>Reconstruction LincRNAs By Luo<br>transcriptId=linc_luo_1893<br>cpcScore=-1.3204600 cnci=-0.0921625                                                                  | NonCoding |
| TC07003092.hg.1 | -5.85  | -2.4  |                   | accn=AJ011910<br>class=mRNAlike lincRNA<br>name=Human lincRNA<br>ref=JournalRNA<br>transcriptId=5322<br>cpcScore=-1.0171800 cnci=-                                                                                                     | NonCoding |



|                 |        |       |                   |                                                                                                                                                |           |
|-----------------|--------|-------|-------------------|------------------------------------------------------------------------------------------------------------------------------------------------|-----------|
|                 |        |       |                   | 0.4715375                                                                                                                                      |           |
| TC18000358.hg.1 | -6.98  | -2.4  |                   | DQ591184,uc002kpr.3                                                                                                                            | Coding    |
| TC04001083.hg.1 | -5.01  | -2.41 | OTTHUMG0000160276 | NULL                                                                                                                                           | Coding    |
| TC10000515.hg.1 | -11.05 | -2.41 |                   | DQ579258,uc021puh.1                                                                                                                            | Coding    |
| TC15000998.hg.1 | -9.11  | -2.41 |                   | DQ596816,uc002cdb.3                                                                                                                            | Coding    |
| TC15001866.hg.1 | -4.43  | -2.41 |                   | DQ597717,uc021sun.1                                                                                                                            | Coding    |
| TC04002870.hg.1 | -4.31  | -2.42 |                   | linc-RWDD4 chr4:-:184653377-184658726                                                                                                          | NonCoding |
| TC05002245.hg.1 | -6.5   | -2.42 |                   | accn=U10508<br>class=mRNAlike lncRNA<br>name=Human lncRNA<br>ref=JounralRNA<br>transcriptId=2801<br>cpcScore=-0.8310320 cnci=-0.1494575        | NonCoding |
| TC11002476.hg.1 | -3.72  | -2.43 |                   | [retired] ncrna:miRNA<br>chromosome:GRCh37:11:134320648:134320733:-1<br>gene:ENSG00000216049<br>gene_biotype:miRNA<br>transcript_biotype:miRNA | Coding    |
| TC13000108.hg.1 | -5.09  | -2.43 | OTTHUMG0000153574 | NULL                                                                                                                                           | Coding    |
| TC22000538.hg.1 | -7.63  | -2.43 | FAM230C           | family with sequence similarity 230, member C; uncharacterized LOC642633; long intergenic non-protein coding RNA 281; NULL                     | Coding    |
| TC02000811.hg.1 | -7.12  | -2.44 |                   | DQ582260,uc002trj.1                                                                                                                            | Coding    |
| TC02002310.hg.1 | -7.12  | -2.44 |                   | DQ587539,uc010yzt.2                                                                                                                            | Coding    |
| TC02002334.hg.1 | -7.12  | -2.44 |                   | DQ587539,uc002tri.2                                                                                                                            | Coding    |
| TC09000251.hg.1 | -7.12  | -2.44 |                   | DQ582260,uc011lqx.1                                                                                                                            | Coding    |
| TC09000299.hg.1 | -7.12  | -2.44 |                   | DQ582260,uc011lri.1                                                                                                                            | Coding    |
| TC09001108.hg.1 | -7.12  | -2.44 |                   | DQ587539,uc004acf.1                                                                                                                            | Coding    |
| TC09001121.hg.1 | -7.12  | -2.44 |                   | DQ587539,uc022bhh.1                                                                                                                            | Coding    |
| TC09001148.hg.1 | -7.12  | -2.44 |                   | DQ587539,uc022bhq.1                                                                                                                            | Coding    |
| TC09001172.hg.1 | -7.12  | -2.44 |                   | DQ587539,uc022bhw.1                                                                                                                            | Coding    |
| TC13000442.hg.1 | -7.04  | -2.44 |                   | DQ587539,uc001uly.1                                                                                                                            | Coding    |
| TC13001134.hg.1 | -6.51  | -2.44 |                   | accn=NULL class=lncRNA<br>name=<br>ref=UCSCGeneNoncode<br>transcriptId=uc010thk.1<br>cpcScore=0.8870790 cnci=-0.0516855                        | NonCoding |
| TC18000083.hg.1 | -6.81  | -2.44 |                   | DQ582260,uc021uhw.1                                                                                                                            | Coding    |

|                              |        |       |           |                                                                                                                                                                             |           |
|------------------------------|--------|-------|-----------|-----------------------------------------------------------------------------------------------------------------------------------------------------------------------------|-----------|
| TC21000279.hg.1              | -7.04  | -2.44 |           | DQ587539,uc021whd.1                                                                                                                                                         | Coding    |
| TC22000446.hg.1              | -7.12  | -2.44 |           | DQ587539,uc021wkf.1                                                                                                                                                         | Coding    |
| TC01004717.hg.1              | -9.07  | -2.46 |           | linc-PPIAL4A-6<br>chr1:+:148852392-<br>148853717                                                                                                                            | NonCoding |
| TC03003284.hg.1              | -7.27  | -2.48 |           | linc-LSG1-2 chr3:-<br>:194565037-194567506                                                                                                                                  | NonCoding |
| TC17001282.hg.1              | -11.54 | -2.48 |           | DQ585914,uc002haf.2                                                                                                                                                         | Coding    |
| TC14000016.hg.1              | -7.1   | -2.49 |           | DQ582260,uc021rnb.1                                                                                                                                                         | Coding    |
| TC02004978.hg.1              | -6.18  | -2.5  | IGKV2D-28 | immunoglobulin kappa<br>variable 2D-28; NULL                                                                                                                                | Coding    |
| TC02004946.hg.1              | -5.2   | -2.51 | IGKV2-28  | immunoglobulin kappa<br>variable 2-28; NULL                                                                                                                                 | Coding    |
| TC01004677.hg.1              | -12.85 | -2.53 |           | linc-NBPF9-8<br>chr1:+:142553292-<br>142559170                                                                                                                              | NonCoding |
| TC04000120.hg.1              | -4.54  | -2.53 |           | DQ584082,uc021xmd.1                                                                                                                                                         | Coding    |
| TC11001644.hg.1              | -9.45  | -2.53 |           | DQ585153,uc001mzx.1                                                                                                                                                         | Coding    |
| TC13001526.hg.1              | -6.88  | -2.53 |           | accn=NULL class=lincRNA<br>name=Human lincRNA<br>ref=Scripture<br>Reconstruction LincRNAs By<br>Luo<br>transcriptId=linc_luo_142<br>cpcScore=-1.3063300 cnci=-<br>0.2426910 | NonCoding |
| TC06000474.hg.1              | -7.36  | -2.54 |           | DQ573430,uc003ohv.3                                                                                                                                                         | Coding    |
| TCOX000847.hg.1              | -8.47  | -2.55 |           | DQ580770,uc022bsq.1                                                                                                                                                         | Coding    |
| TC22000059.hg.1              | -7.92  | -2.55 | LOC729444 | uncharacterized<br>LOC729444; NULL                                                                                                                                          | Coding    |
| TC19002656.hg.1              | -2.17  | -2.58 | KIR2DL4   | killer cell immunoglobulin-<br>like receptor, two domains,<br>long cytoplasmic tail, 4;<br>NULL                                                                             | Coding    |
| TC08002004.hg.1              | -8.43  | -2.6  |           | accn=NULL class=lncRNA<br>name=<br>ref=EnsemblNoncode<br>transcriptId=ENST00000508<br>419 cpcScore=2.1115700<br>cnci=-0.1978256                                             | NonCoding |
| TC17001289.hg.1              | -12.76 | -2.6  |           | DQ581055,DQ585914,uc02<br>1ttn.1,uc002hao.3                                                                                                                                 | Coding    |
| TCUn_gl0002280<br>00014.hg.1 | -10.62 | -2.6  |           | DUX4,HQ266764,NM_0331<br>78,NR_038191,uc022bro.1                                                                                                                            | Coding    |
| TC10000296.hg.1              | -7.19  | -2.61 | RNA5SP310 | RNA, 5S ribosomal<br>pseudogene 310                                                                                                                                         | Coding    |
| TC10000333.hg.1              | -7.19  | -2.61 | RNA5SP316 | RNA, 5S ribosomal                                                                                                                                                           | Coding    |

|                 |        |       |           |                                                                                                                                                                                                                                                                                                         |           |
|-----------------|--------|-------|-----------|---------------------------------------------------------------------------------------------------------------------------------------------------------------------------------------------------------------------------------------------------------------------------------------------------------|-----------|
|                 |        |       |           | pseudogene 316                                                                                                                                                                                                                                                                                          |           |
| TC05003371.hg.1 | -6.9   | -2.63 |           | linc-FAM153A-2 chr5:-<br>:177387461-<br>177391278 linc-FAM153A-2<br>chr5:-:177387471-<br>177392855 linc-FAM153A-2<br>chr5:-:177388523-<br>177388871                                                                                                                                                     | NonCoding |
| TC15001949.hg.1 | -8.43  | -2.63 |           | DQ595853,uc002bua.1                                                                                                                                                                                                                                                                                     | Coding    |
| TC22001237.hg.1 | -8.97  | -2.63 |           | linc-SLC7A4-6 chr22:-<br>:21655278-21679331 linc-<br>SLC7A4-6 chr22:-:21655279-<br>21664170 linc-SLC7A4-6<br>chr22:-:21655285-<br>21679331 linc-SLC7A4-6<br>chr22:-:21664109-<br>21677143 linc-SLC7A4-6<br>chr22:-:21666028-<br>21679331 linc-SLC7A4-6<br>chr22:-:21673555-<br>21679433 linc-SLC7A4-6 c | NonCoding |
| TC10000305.hg.1 | -7.27  | -2.65 | RNA5SP312 | RNA, 5S ribosomal<br>pseudogene 312                                                                                                                                                                                                                                                                     | Coding    |
| TC10000321.hg.1 | -7.27  | -2.65 | RNA5SP315 | RNA, 5S ribosomal<br>pseudogene 315                                                                                                                                                                                                                                                                     | Coding    |
| TC10001247.hg.1 | -7.27  | -2.65 | RNA5SP313 | RNA, 5S ribosomal<br>pseudogene 313                                                                                                                                                                                                                                                                     | Coding    |
| TC12002520.hg.1 | -7.9   | -2.65 |           | accn=NR_037687<br>class=lncRNA name=<br>ref=RefGeneNoncode<br>transcriptId=NR_037687<br>cpcScore=6.7736100 cnci=-<br>0.2530751                                                                                                                                                                          | NonCoding |
| TC19002358.hg.1 | -11.22 | -2.65 |           | accn=AF399542<br>class=mRNAlike lncRNA<br>name=NULL ref=H-<br>invitational v7.5<br>transcriptId=HIT000383959<br>cpcScore=5.5736800 cnci=-<br>0.1055078                                                                                                                                                  | NonCoding |
| TC01002356.hg.1 | -4.03  | -2.66 |           | DQ588542,uc021oit.1                                                                                                                                                                                                                                                                                     | Coding    |
| TC05002149.hg.1 | -7.4   | -2.67 |           | DQ589679,uc021yjm.1                                                                                                                                                                                                                                                                                     | Coding    |
| TC17000278.hg.1 | -9.11  | -2.67 |           | DQ578310,uc010vzu.2                                                                                                                                                                                                                                                                                     | Coding    |
| TC06000488.hg.1 | -6.57  | -2.71 |           | DQ589595,uc011dsg.1                                                                                                                                                                                                                                                                                     | Coding    |
| TC10000466.hg.1 | -9.34  | -2.72 | RNA5SP320 | RNA, 5S ribosomal<br>pseudogene 320                                                                                                                                                                                                                                                                     | Coding    |
| TC22000973.hg.1 | -9.48  | -2.72 |           | linc-ZNF74-4                                                                                                                                                                                                                                                                                            | NonCoding |

|                 |        |       |          |                                                                                                                                                                                                                                                                      |           |
|-----------------|--------|-------|----------|----------------------------------------------------------------------------------------------------------------------------------------------------------------------------------------------------------------------------------------------------------------------|-----------|
|                 |        |       |          | chr22:+:20325556-20332103 linc-ZNF74-4<br>chr22:+:20325589-20329425 linc-ZNF74-4<br>chr22:+:20325665-20350461 linc-ZNF74-4<br>chr22:+:20325665-20350461 linc-ZNF74-4<br>chr22:+:20326398-20350450 linc-ZNF74-4<br>chr22:+:20326398-20350461 linc-ZNF74-4<br>chr22:+: |           |
| TC14000036.hg.1 | -6.95  | -2.74 | OR4N2    | olfactory receptor, family 4, subfamily N, member 2                                                                                                                                                                                                                  | Coding    |
| TC01004099.hg.1 | -11.5  | -2.75 |          | accn=NULL class=mRNALike lincRNA name=vega lincRNA ref=GENCODE transcriptId=OTTHUMT00000007169 cpcScore=-0.9192430 cnci=-0.2066822                                                                                                                                   | NonCoding |
| TC04000460.hg.1 | -2.15  | -2.75 | AGPAT9   | 1-acylglycerol-3-phosphate O-acyltransferase 9; NULL                                                                                                                                                                                                                 | Coding    |
| TC0Y000217.hg.1 | -6.38  | -2.75 |          | DQ596138,uc011nbx.1                                                                                                                                                                                                                                                  | Coding    |
| TC09001705.hg.1 | -8.07  | -2.77 | MIR3689C | microRNA 3689c                                                                                                                                                                                                                                                       | Coding    |
| TC01000920.hg.1 | -11.81 | -2.78 |          | CU675524,uc010our.1                                                                                                                                                                                                                                                  | Coding    |
| TC20000381.hg.1 | -8.96  | -2.78 |          | [retired] havana:lincRNA chromosome:GRCh37:20:47100223:47130447:1 gene:ENSG00000229963 gene_biotype:lincRNA transcript_biotype:lincRNA                                                                                                                               | Coding    |
| TC04002624.hg.1 | -7.01  | -2.8  |          | accn=AF094508 class=mRNALike lincRNA name=NULL ref=H-invitational v7.5 transcriptId=HIT000068406 cpcScore=6.8551300 cnci=-0.0396781                                                                                                                                  | NonCoding |
| TC17000280.hg.1 | -6.25  | -2.8  |          | DQ580080,uc010vzw.1                                                                                                                                                                                                                                                  | Coding    |
| TC17000272.hg.1 | -5.29  | -2.81 |          | DQ598304,uc010vzo.2                                                                                                                                                                                                                                                  | Coding    |
| TC20001334.hg.1 | -10.81 | -2.83 |          | linc-LSM14B-2 chr20:+:60520107-60523627                                                                                                                                                                                                                              | NonCoding |
| TC22001089.hg.1 | -6.08  | -2.83 |          | accn=M23041 class=mRNALike lincRNA name=NULL ref=H-                                                                                                                                                                                                                  | NonCoding |

|                 |        |       |                        |                                                                                                                                                          |           |
|-----------------|--------|-------|------------------------|----------------------------------------------------------------------------------------------------------------------------------------------------------|-----------|
|                 |        |       |                        | invitational v7.5<br>transcriptId=HIT000194871<br>cpcScore=2.1104100 cnci=-<br>0.0596197                                                                 |           |
| TC01003165.hg.1 | -9.45  | -2.84 |                        | ncrna:snRNA<br>chromosome:GRCh37:1:149<br>286177:149286322:-1<br>gene:ENSG00000252105<br>gene_biotype:snRNA<br>transcript_biotype:snRNA                  | Coding    |
| TC01003181.hg.1 | -9.45  | -2.84 |                        | ncrna:snRNA<br>chromosome:GRCh37:1:149<br>671723:149671868:-1<br>gene:ENSG00000252925<br>gene_biotype:snRNA<br>transcript_biotype:snRNA                  | Coding    |
| TC08000036.hg.1 | -4.8   | -2.86 | DEFB108P2              | NULL                                                                                                                                                     | Coding    |
| TC11001603.hg.1 | -8.66  | -2.88 |                        | DQ583612,uc001mza.3                                                                                                                                      | Coding    |
| TC18000910.hg.1 | -9.17  | -2.9  |                        | accn=AF133658<br>class=mRNAlike lincRNA<br>name=NULL ref=H-<br>invitational v7.5<br>transcriptId=HIT000070983<br>cpcScore=-0.1775420 cnci=-<br>0.2149474 | NonCoding |
| TC10002567.hg.1 | -9.68  | -2.91 |                        | linc-ZNF25-1 chr10:-<br>:42383278-42391866                                                                                                               | NonCoding |
| TC01003061.hg.1 | -9.76  | -2.92 | OTTHUMG00<br>000013378 | NULL                                                                                                                                                     | Coding    |
| TC01005754.hg.1 | -8.19  | -2.92 |                        | linc-FCGR1B-7 chr1:-<br>:121484056-<br>121485434 linc-FCGR1B-7<br>chr1:-:121484423-<br>121485429                                                         | NonCoding |
| TC12001220.hg.1 | -7.43  | -2.92 |                        | havana:lincRNA<br>chromosome:GRCh37:12:10<br>485460:10490891:-1<br>gene:ENSG00000256288<br>gene_biotype:lincRNA<br>transcript_biotype:lincRNA            | Coding    |
| TC12000730.hg.1 | -8.31  | -2.95 | PLXNC1                 | plexin C1                                                                                                                                                | Coding    |
| TC14000012.hg.1 | -15.08 | -2.96 |                        | DQ595091,uc021rmy.1                                                                                                                                      | Coding    |
| TC14000018.hg.1 | -15.08 | -2.96 |                        | DQ595091,uc021rne.1                                                                                                                                      | Coding    |
| TC14000864.hg.1 | -15.08 | -2.96 |                        | DQ582484,uc021rnl.1                                                                                                                                      | Coding    |
| TC14000867.hg.1 | -15.08 | -2.96 |                        | DQ582484,uc021rnn.1                                                                                                                                      | Coding    |
| TC22000447.hg.1 | -15.08 | -2.96 |                        | DQ582484,uc002zlb.3                                                                                                                                      | Coding    |
| TC22000452.hg.1 | -15.08 | -2.96 |                        | DQ582484,uc002zld.3                                                                                                                                      | Coding    |

|                 |        |       |                        |                                                                                                                                                 |           |
|-----------------|--------|-------|------------------------|-------------------------------------------------------------------------------------------------------------------------------------------------|-----------|
| TC02000533.hg.1 | -13.4  | -3    |                        | DQ576039,uc002ssi.2                                                                                                                             | Coding    |
| TC02000561.hg.1 | -13.4  | -3    |                        | DQ576039,uc010ytw.2                                                                                                                             | Coding    |
| TC02002078.hg.1 | -13.4  | -3    |                        | DQ576041,uc010yty.2                                                                                                                             | Coding    |
| TC02002081.hg.1 | -13.4  | -3    |                        | DQ576041,uc002stq.2                                                                                                                             | Coding    |
| TC02004870.hg.1 | -8.09  | -3.02 |                        | linc-IQCA1-2 chr2:-<br>:238037369-238039886                                                                                                     | NonCoding |
| TC11002928.hg.1 | -8.05  | -3.04 |                        | accn=X89669<br>class=mRNALike lincRNA<br>name=Human lincRNA<br>ref=JounralRNA<br>transcriptId=5293<br>cpcScore=3.8293500 cnci=-<br>0.1633526    | NonCoding |
| TC12000663.hg.1 | -6.43  | -3.04 |                        | havana:lincRNA<br>chromosome:GRCh37:12:79<br>933983:79940334:1<br>gene:ENSG00000257474<br>gene_biotype:lincRNA<br>transcript_biotype:lincRNA    | Coding    |
| TC02000729.hg.1 | -15.25 | -3.05 |                        | DQ598479,uc002tjy.1                                                                                                                             | Coding    |
| TC04000716.hg.1 | -4.71  | -3.05 | OTTHUMG00<br>000162028 | NULL                                                                                                                                            | Coding    |
| TC20001263.hg.1 | -8.8   | -3.07 |                        | linc-ARFGEF2-2<br>chr20:+:47126390-<br>47133386 linc-ARFGEF2-2<br>chr20:+:47126390-<br>47133386 linc-ARFGEF2-2<br>chr20:+:47129834-<br>47133716 | NonCoding |
| TC04002789.hg.1 | -6.06  | -3.09 |                        | linc-TMEM154 chr4:-<br>:153662549-153667773                                                                                                     | NonCoding |
| TC04001512.hg.1 | -8.48  | -3.15 |                        | ncrna:snRNA<br>chromosome:GRCh37:4:122<br>113952:122114058:-1<br>gene:ENSG00000252183<br>gene_biotype:snRNA<br>transcript_biotype:snRNA         | Coding    |
| TC11002453.hg.1 | -6.65  | -3.15 |                        | ENSG00000255658,ENST00<br>000538996.1                                                                                                           | Coding    |
| TC01005755.hg.1 | -13.44 | -3.16 |                        | linc-FCGR1B-8 chr1:-<br>:142569265-142588234                                                                                                    | NonCoding |
| TC18000331.hg.1 | -5.14  | -3.17 |                        | DQ578665,uc002kpb.1                                                                                                                             | Coding    |
| TC11003415.hg.1 | -7.42  | -3.2  |                        | accn=NULL class=lincRNA<br>name=<br>ref=EnsemblNoncode<br>transcriptId=ENST00000538<br>996 cpcScore=-1.1912700                                  | NonCoding |

|                         |        |       |          |                                                                                                                                                                      |           |
|-------------------------|--------|-------|----------|----------------------------------------------------------------------------------------------------------------------------------------------------------------------|-----------|
|                         |        |       |          | cnci=-0.2738760                                                                                                                                                      |           |
| TC04001117.hg.1         | -5.37  | -3.23 |          | ncrna:misc_RNA<br>chromosome:GRCh37:4:37701517:37701624:-1<br>gene:ENSG00000207075<br>gene_biotype:misc_RNA<br>transcript_biotype:misc_RNA                           | Coding    |
| TC16001920.hg.1         | -9.05  | -3.24 |          | accn=NULL class=lincRNA<br>name=Human lincRNA<br>ref=Scripture<br>Reconstruction LincRNAs By Luo<br>transcriptId=linc_luo_168<br>cpcScore=-1.3471600 cnci=-0.3408175 | NonCoding |
| TC02000836.hg.1         | -12.86 | -3.25 |          | DQ600792,uc021vpc.1                                                                                                                                                  | Coding    |
| TC02000839.hg.1         | -12.86 | -3.25 |          | DQ600792,uc021vpe.1                                                                                                                                                  | Coding    |
| TC02002312.hg.1         | -12.86 | -3.25 |          | DQ589348,uc021vnv.1                                                                                                                                                  | Coding    |
| TC06001608.hg.1         | -8.35  | -3.26 |          | DQ577977,uc003ofl.1                                                                                                                                                  | Coding    |
| TC19001245.hg.1         | -11.4  | -3.3  | OR7A10   | olfactory receptor, family 7, subfamily A, member 10                                                                                                                 | Coding    |
| TC02000819.hg.1         | -10.2  | -3.36 |          | DQ600792,uc021vot.1                                                                                                                                                  | Coding    |
| TC02000822.hg.1         | -10.2  | -3.36 |          | DQ600792,uc021vow.1                                                                                                                                                  | Coding    |
| TC02000823.hg.1         | -10.2  | -3.36 |          | DQ600792,uc021vox.1                                                                                                                                                  | Coding    |
| TC02002333.hg.1         | -10.2  | -3.36 |          | DQ589348,uc021vom.1                                                                                                                                                  | Coding    |
| TC02002335.hg.1         | -10.2  | -3.36 |          | DQ589348,uc021von.1                                                                                                                                                  | Coding    |
| TC02002336.hg.1         | -10.2  | -3.36 |          | DQ589348,uc021voo.1                                                                                                                                                  | Coding    |
| TC04000095.hg.1         | -18.57 | -3.36 | USP17L10 | ubiquitin specific peptidase 17-like family member 10;<br>ubiquitin specific peptidase 17-like family member 13;<br>NULL                                             | Coding    |
| TC09001343.hg.1         | -21.92 | -3.36 |          | DQ573684,uc022bkb.1                                                                                                                                                  | Coding    |
| TC02002219.hg.1         | -18.53 | -3.39 | IL1B     | interleukin 1, beta; NULL                                                                                                                                            | Coding    |
| TC02000859.hg.1         | -23.42 | -3.41 |          | DQ583165,uc010zbc.2                                                                                                                                                  | Coding    |
| TC22000444.hg.1         | -23.42 | -3.41 |          | DQ573684,uc021wke.1                                                                                                                                                  | Coding    |
| TC08001383.hg.1         | -10.38 | -3.46 | REXO1L2P | REX1, RNA exonuclease 1 homolog (S. cerevisiae)-like 2 (pseudogene)                                                                                                  | Coding    |
| TCUn_gl00022100001.hg.1 | -8.38  | -3.46 |          | DQ592442,uc011mfv.1                                                                                                                                                  | Coding    |
| TC01000388.hg.1         | -7.88  | -3.51 | RNU11    | RNA, U11 small nuclear                                                                                                                                               | Coding    |
| TC08002406.hg.1         | -15.96 | -3.51 |          | accn=NR_003594<br>class=lncRNA name=<br>ref=RefGeneNoncode<br>transcriptId=NR_003594                                                                                 | NonCoding |

|                 |        |       |  |                                                                                                                                                                                                                                                                                                 |           |
|-----------------|--------|-------|--|-------------------------------------------------------------------------------------------------------------------------------------------------------------------------------------------------------------------------------------------------------------------------------------------------|-----------|
|                 |        |       |  | cpcScore=5.4541000 cnci=-0.0385011                                                                                                                                                                                                                                                              |           |
| TC18000797.hg.1 | -8.72  | -3.53 |  | linc-PARD6G-2 chr18:-:106601-108335                                                                                                                                                                                                                                                             | NonCoding |
| TC15000172.hg.1 | -13    | -3.6  |  | DQ583847,uc021shg.1                                                                                                                                                                                                                                                                             | Coding    |
| TC15000215.hg.1 | -13    | -3.6  |  | DQ583847,uc001zgl.3                                                                                                                                                                                                                                                                             | Coding    |
| TC15001121.hg.1 | -13    | -3.6  |  | DQ577333,uc001zda.3                                                                                                                                                                                                                                                                             | Coding    |
| TC15001148.hg.1 | -13    | -3.6  |  | DQ577333,uc001zem.3                                                                                                                                                                                                                                                                             | Coding    |
| TC07002493.hg.1 | -7.17  | -3.62 |  | accn=AF007193<br>class=mRNAlike lncRNA<br>name=NULL ref=H-<br>invitational v7.5<br>transcriptId=HIT000061898<br>cpcScore=1.0854600 cnci=-0.1825470 accn=M55405<br>class=mRNAlike lncRNA<br>name=NULL ref=H-<br>invitational v7.5<br>transcriptId=HIT000195782<br>cpcScore=-0.9085650 cnci=-1.00 | NonCoding |
| TC05001890.hg.1 | -9.72  | -3.72 |  | ncrna:snRNA<br>chromosome:GRCh37:5:142922079:142922152:-1<br>gene:ENSG00000253023<br>gene_biotype:snRNA<br>transcript_biotype:snRNA                                                                                                                                                             | Coding    |
| TC04002853.hg.1 | -8.65  | -3.78 |  | linc-AGA-10 chr4:-:180087669-180091375 linc-AGA-10 chr4:-:180087669-180091246                                                                                                                                                                                                                   | NonCoding |
| TC0Y000099.hg.1 | -14.99 | -3.82 |  | DQ600137,uc011nby.2                                                                                                                                                                                                                                                                             | Coding    |
| TC0Y000204.hg.1 | -14.99 | -3.82 |  | DQ577902,uc011nbq.1                                                                                                                                                                                                                                                                             | Coding    |
| TC06002606.hg.1 | -14.93 | -3.9  |  | linc-FAM8A1<br>chr6:+:17587063-17587418                                                                                                                                                                                                                                                         | NonCoding |
| TC19001925.hg.1 | -11.16 | -4.18 |  | linc-MADCAM1<br>chr19:+:302197-304321 linc-MADCAM1<br>chr19:+:302227-303170 linc-MADCAM1<br>chr19:+:302322-302944 linc-MADCAM1<br>chr19:+:303035-304321 linc-MADCAM1<br>chr19:+:303339-304460                                                                                                   | NonCoding |
| TC12002492.hg.1 | -11.08 | -4.22 |  | linc-CLLU1-11                                                                                                                                                                                                                                                                                   | NonCoding |



|                 |        |       |                   |                                                                                                                                                                                                                                                                     |           |
|-----------------|--------|-------|-------------------|---------------------------------------------------------------------------------------------------------------------------------------------------------------------------------------------------------------------------------------------------------------------|-----------|
|                 |        |       |                   | chr12:+:88811914-88813084                                                                                                                                                                                                                                           |           |
| TC01001069.hg.1 | -14.61 | -4.23 | OTTHUMG0000013631 | NULL                                                                                                                                                                                                                                                                | Coding    |
| TC01004685.hg.1 | -15.31 | -4.23 |                   | linc-NBPF9-2<br>chr1:+:143498343-143517299                                                                                                                                                                                                                          | NonCoding |
| TC09001627.hg.1 | -9.62  | -4.24 |                   | DQ575742,uc004buf.1                                                                                                                                                                                                                                                 | Coding    |
| TC15002336.hg.1 | -8.86  | -4.32 |                   | linc-ZSCAN2-2<br>chr15:+:85054685-85055992                                                                                                                                                                                                                          | NonCoding |
| TC04000100.hg.1 | -18.34 | -4.37 | USP17L19          | ubiquitin specific peptidase 17-like family member 19;<br>NULL                                                                                                                                                                                                      | Coding    |
| TC08001384.hg.1 | -17.27 | -4.5  | REXO1L1           | REX1, RNA exonuclease 1 homolog ( <i>S. cerevisiae</i> )-like 1; exonuclease GOR-like;<br>NULL                                                                                                                                                                      | Coding    |
| TC15002028.hg.1 | -10.09 | -4.56 |                   | DQ582666,uc002byc.3                                                                                                                                                                                                                                                 | Coding    |
| TC15002031.hg.1 | -10.09 | -4.56 |                   | DQ593627,uc002byj.3                                                                                                                                                                                                                                                 | Coding    |
| TC15002034.hg.1 | -10.09 | -4.56 |                   | DQ593627,uc010usn.2                                                                                                                                                                                                                                                 | Coding    |
| TC15002043.hg.1 | -10.09 | -4.56 |                   | DQ593627,uc002bzk.3                                                                                                                                                                                                                                                 | Coding    |
| TC15002046.hg.1 | -10.09 | -4.56 |                   | DQ593627,uc002bzs.3                                                                                                                                                                                                                                                 | Coding    |
| TC15002049.hg.1 | -10.09 | -4.56 |                   | DQ593627,uc021syq.1                                                                                                                                                                                                                                                 | Coding    |
| TC01005189.hg.1 | -11.29 | -4.66 |                   | accn=NULL class=mRNAlike lincRNA name=vega lincRNA ref=GENCODE transcriptId=OTTHUMT0000007988 cpcScore=-0.8871240 cnci=-0.0601337   accn=NULL class=mRNAlike lincRNA name=vega lincRNA ref=GENCODE transcriptId=OTTHUMT0000007987 cpcScore=-0.9979760 cnci=-0.04890 | NonCoding |
| TC15000159.hg.1 | -12.25 | -4.66 |                   | DQ575741,uc021sgz.1                                                                                                                                                                                                                                                 | Coding    |
| TC15000185.hg.1 | -12.25 | -4.66 |                   | DQ575741,uc021shr.1                                                                                                                                                                                                                                                 | Coding    |
| TC15000960.hg.1 | -12.25 | -4.66 |                   | DQ575741,uc002bvt.1                                                                                                                                                                                                                                                 | Coding    |
| TC15001139.hg.1 | -12.25 | -4.66 |                   | DQ575741,uc010uay.1                                                                                                                                                                                                                                                 | Coding    |
| TC15001173.hg.1 | -12.25 | -4.66 |                   | DQ575741,uc021sif.1                                                                                                                                                                                                                                                 | Coding    |
| TC04000097.hg.1 | -18.99 | -4.78 | USP17L12          | ubiquitin specific peptidase 17-like family member 12;<br>NULL                                                                                                                                                                                                      | Coding    |
| TC03003289.hg.1 | -7.85  | -4.82 |                   | accn=AF058804 class=mRNAlike lincRNA                                                                                                                                                                                                                                | NonCoding |

|                 |        |       |          |                                                                                                                                                                                                 |           |
|-----------------|--------|-------|----------|-------------------------------------------------------------------------------------------------------------------------------------------------------------------------------------------------|-----------|
|                 |        |       |          | name=NULL ref=H-<br>invitational v7.5<br>transcriptId=HIT000064809<br>cpcScore=-0.8819030 cnci=-<br>0.0161171                                                                                   |           |
| TC04000098.hg.1 | -16.23 | -4.89 | USP17L15 | ubiquitin specific peptidase<br>17-like family member 15;<br>NULL                                                                                                                               | Coding    |
| TC04000101.hg.1 | -17.46 | -4.89 | USP17L21 | ubiquitin specific peptidase<br>17-like family member 21;<br>NULL                                                                                                                               | Coding    |
| TC08001385.hg.1 | -18.35 | -4.91 | REXO1L1  | REX1, RNA exonuclease 1<br>homolog ( <i>S. cerevisiae</i> )-like<br>1; exonuclease GOR-like                                                                                                     | Coding    |
| TC01005132.hg.1 | -9.61  | -4.98 |          | linc-GPR137B-1<br>chr1+:236260401-<br>236261074 linc-GPR137B-1<br>chr1+:236260401-<br>236261074 linc-GPR137B-1<br>chr1+:236260401-<br>236261074 linc-GPR137B-1<br>chr1+:236260401-<br>236261074 | NonCoding |
| TC07001516.hg.1 | -28.26 | -4.98 | NCF1C    | neutrophil cytosolic factor<br>1C pseudogene                                                                                                                                                    | Coding    |
| TC10002908.hg.1 | -23.72 | -5    |          | linc-TCERG1L-3 chr10:-<br>:133730127-133733387                                                                                                                                                  | NonCoding |
| TC04000099.hg.1 | -17.63 | -5.03 | USP17L18 | ubiquitin specific peptidase<br>17-like family member 18;<br>NULL                                                                                                                               | Coding    |
| TC07002494.hg.1 | -21.34 | -5.15 |          | accn=AK025404<br>class=mRNAlike lincRNA<br>name=NULL ref=H-<br>invitational v7.5<br>transcriptId=HIT000008678<br>cpcScore=2.1611700 cnci=-<br>0.0825375                                         | NonCoding |
| TC15002025.hg.1 | -8.62  | -5.17 |          | DQ582666,uc002bxy.2                                                                                                                                                                             | Coding    |
| TC15000769.hg.1 | -17.61 | -5.34 |          | DQ601279,uc002bhd.1                                                                                                                                                                             | Coding    |
| TC15000782.hg.1 | -17.61 | -5.34 |          | DQ601279,uc021stc.1                                                                                                                                                                             | Coding    |
| TC15000804.hg.1 | -17.61 | -5.34 |          | DQ601279,uc021sti.1                                                                                                                                                                             | Coding    |
| TC15001780.hg.1 | -17.61 | -5.34 |          | DQ601279,uc002bkj.1                                                                                                                                                                             | Coding    |
| TC15002052.hg.1 | -18.77 | -5.37 |          | DQ582462,uc002car.3                                                                                                                                                                             | Coding    |
| TC15002053.hg.1 | -18.77 | -5.37 |          | DQ582462,uc021syy.1                                                                                                                                                                             | Coding    |
| TC15002029.hg.1 | -9.79  | -5.45 |          | DQ593630,uc021syf.1                                                                                                                                                                             | Coding    |
| TC04000111.hg.1 | -17.58 | -5.69 | USP17L6P | ubiquitin specific peptidase<br>17-like family member 6,                                                                                                                                        | Coding    |

|                 |        |       |          |                                                                                                                                                           |           |
|-----------------|--------|-------|----------|-----------------------------------------------------------------------------------------------------------------------------------------------------------|-----------|
|                 |        |       |          | pseudogene; NULL                                                                                                                                          |           |
| TC0Y000098.hg.1 | -32.7  | -5.8  |          | DQ581594,uc004fxd.3                                                                                                                                       | Coding    |
| TC0Y000205.hg.1 | -32.7  | -5.8  |          | DQ574758,uc022cop.1                                                                                                                                       | Coding    |
| TC15000772.hg.1 | -32.7  | -5.8  |          | DQ581594,uc002bhk.3                                                                                                                                       | Coding    |
| TC15000779.hg.1 | -32.7  | -5.8  |          | DQ581594,uc002bhz.3                                                                                                                                       | Coding    |
| TC15000785.hg.1 | -32.7  | -5.8  |          | DQ581594,uc002bik.3                                                                                                                                       | Coding    |
| TC15000807.hg.1 | -32.7  | -5.8  |          | DQ574760,uc002bkd.3                                                                                                                                       | Coding    |
| TC15000811.hg.1 | -32.7  | -5.8  |          | DQ581594,uc002bki.3                                                                                                                                       | Coding    |
| TC15000826.hg.1 | -32.7  | -5.8  |          | DQ574760,uc002blq.3                                                                                                                                       | Coding    |
| TC15001740.hg.1 | -32.7  | -5.8  |          | DQ574758,uc002bhc.3                                                                                                                                       | Coding    |
| TC15001742.hg.1 | -32.7  | -5.8  |          | DQ574758,uc002bhp.2                                                                                                                                       | Coding    |
| TC15001747.hg.1 | -32.7  | -5.8  |          | DQ574758,uc002bhx.3                                                                                                                                       | Coding    |
| TC15001751.hg.1 | -32.7  | -5.8  |          | DQ574758,uc002cfa.3                                                                                                                                       | Coding    |
| TC15001753.hg.1 | -32.7  | -5.8  |          | DQ574758,uc002bim.3                                                                                                                                       | Coding    |
| TC15001770.hg.1 | -32.7  | -5.8  |          | DQ574758,uc010uou.2                                                                                                                                       | Coding    |
| TC04001892.hg.1 | -19.99 | -5.85 |          | accn=NR_027279<br>class=lncRNA name=<br>ref=RefGeneNoncode<br>transcriptId=NR_027279<br>cpcScore=4.2575600 cnci=-<br>0.0492218                            | NonCoding |
| TC07000438.hg.1 | -30.2  | -5.92 | NCF1B    | neutrophil cytosolic factor<br>1B pseudogene                                                                                                              | Coding    |
| TC03003290.hg.1 | -17.03 | -5.96 |          | accn=AF177925<br>class=mRNAlike lncRNA<br>name=NULL ref=H-<br>invitational v7.5<br>transcriptId=HIT000072731<br>_03 cpcScore=1.9245000<br>cnci=-0.0315219 | NonCoding |
| TC0Y000085.hg.1 | -36.28 | -6.05 |          | DQ581594,uc022cot.1                                                                                                                                       | Coding    |
| TC0Y000220.hg.1 | -36.28 | -6.05 |          | DQ574758,uc004fwz.3                                                                                                                                       | Coding    |
| TC06003171.hg.1 | -24.58 | -6.55 |          | accn=NULL class=mRNAlike<br>lncRNA name=vega lncRNA<br>ref=Gencode<br>transcriptId=OTTHUMT0000<br>0042954 cpcScore=-<br>1.0629000 cnci=-0.0971014         | NonCoding |
| TC04000102.hg.1 | -19.63 | -6.64 | USP17L23 | ubiquitin specific peptidase<br>17-like family member 23;<br>NULL                                                                                         | Coding    |
| TC15001627.hg.1 | -31.04 | -6.67 |          | DQ582073,uc002aux.1                                                                                                                                       | Coding    |
| TC04000408.hg.1 | -13.18 | -7.85 | IL8      | interleukin 8; NULL                                                                                                                                       | Coding    |
| TC17000383.hg.1 | -76.1  | -8.4  | CCL2     | chemokine (C-C motif)<br>ligand 2; NULL                                                                                                                   | Coding    |
| TC04000478.hg.1 | -22.44 | -8.44 | SPP1     | secreted phosphoprotein 1;<br>NULL                                                                                                                        | Coding    |

|                 |        |        |         |                                                                                                                                                         |           |
|-----------------|--------|--------|---------|---------------------------------------------------------------------------------------------------------------------------------------------------------|-----------|
| TC16001514.hg.1 | -15.03 | -8.69  |         | linc-ORC6-7<br>chr16:+:33340192-<br>33343609                                                                                                            | NonCoding |
| TC01004129.hg.1 | -29.17 | -9.25  |         | linc-TMEM88B-1<br>chr1:+:1317608-<br>1318166 linc-TMEM88B-1<br>chr1:+:1317652-1318166                                                                   | NonCoding |
| TC05001641.hg.1 | -18.69 | -11.47 | SLCO4C1 | solute carrier organic anion<br>transporter family, member<br>4C1; NULL                                                                                 | Coding    |
| TC04002100.hg.1 | -29.9  | -12.25 |         | accn=AY956318<br>class=mRNAlike lincRNA<br>name=NULL ref=H-<br>invitational v7.5<br>transcriptId=HIT000333296<br>cpcScore=0.3543570 cnci=-<br>0.3343817 | NonCoding |

**Table S3. Patient information on APL human samples**

| No. | Sex | Age | Tissue              | Diagnosis |
|-----|-----|-----|---------------------|-----------|
| 1   | F   | 66  | Bone marrow         | Normal    |
| 2   | M   | 62  | Bone marrow         | Normal    |
| 3   | M   | 66  | Bone marrow         | Normal    |
| 4   | M   | 53  | Bone marrow         | Normal    |
| 5   | M   | 62  | Bone marrow         | Normal    |
| 6   | M   | 36  | Bone marrow         | Normal    |
| 7   | M   | 30  | Bone marrow         | Normal    |
| 8   | F   | 61  | Bone marrow         | Normal    |
| 9   | M   | 72  | Bone marrow         | Normal    |
| 10  | F   | 62  | Bone marrow         | Normal    |
| 11  | M   | 71  | Bone marrow         | Normal    |
| 12  | M   | 45  | Bone marrow         | Normal    |
| 13  | M   | 63  | Bone marrow         | Normal    |
| 14  | F   | 43  | Bone marrow         | Normal    |
| 15  | M   | 58  | Bone marrow         | Normal    |
| 16  | M   | 75  | Bone marrow         | Normal    |
| 17  | F   | 21  | Bone marrow         | Normal    |
| 18  | M   | 66  | Bone marrow         | Normal    |
| 19  | M   | 53  | Bone marrow         | Normal    |
| 20  | M   | 41  | Bone marrow         | Normal    |
| 21  | M   | 60  | Bone marrow         | Normal    |
| 22  | M   | 75  | Bone marrow         | Normal    |
| 23  | M   | 63  | Bone marrow         | Normal    |
| 24  | F   | 50  | Bone marrow         | Normal    |
| 25  | F   | 23  | Bone marrow         | APL       |
| 26  | M   | 38  | Bone marrow         | APL       |
| 27  | F   | 32  | Bone marrow         | APL       |
| 28  | F   | 59  | Bone marrow         | APL       |
| 29  | F   | 28  | Bone marrow         | APL       |
| 30  | F   | 61  | Bone marrow         | APL       |
| 31  | M   | 22  | Bone marrow         | APL       |
| 32  | M   | 51  | Bone marrow         | APL       |
| 33  | M   | 33  | Bone marrow         | APL       |
| 34  | F   | 27  | Bone marrow         | APL       |
| 35  | M   | 33  | Bone marrow         | APL       |
| 36  | M   | 22  | Bone marrow         | APL       |
| 37  | F   | 58  | Blood               | APL       |
| 38  | M   | 16  | Bone marrow         | APL       |
| 39  | M   | 5   | Blood               | APL       |
| 40  | M   | 5   | Bone marrow         | APL       |
| 41  | F   | 57  | Blood + Bone marrow | APL       |
| 42  | F   | 42  | Bone marrow         | APL       |
| 43  | F   | 24  | Bone marrow         | APL       |
| 44  | M   | 21  | Bone marrow         | APL       |
| 45  | M   | 69  | Bone marrow         | APL       |
| 46  | F   | 4   | Bone marrow         | APL       |
| 47  | M   | 82  | Bone marrow         | APL       |
| 48  | F   | 78  | Bone marrow         | APL       |
| 49  | M   | 22  | Bone marrow         | APL       |
| 50  | M   | 31  | Bone marrow         | Remission |

|    |   |    |             |           |
|----|---|----|-------------|-----------|
| 51 | M | 3  | Bone marrow | Remission |
| 52 | F | 7  | Bone marrow | Remission |
| 53 | M | 11 | Bone marrow | Remission |
| 54 | M | 13 | Bone marrow | Remission |
| 55 | F | 57 | Bone marrow | Remission |
| 56 | F | 38 | Bone marrow | Remission |
| 57 | F | 54 | Bone marrow | Remission |
| 58 | M | 31 | Bone marrow | Remission |
| 59 | M | 12 | Bone marrow | Remission |
| 60 | M | 20 | Bone marrow | Remission |
| 61 | M | 20 | Bone marrow | Remission |
| 62 | M | 50 | Bone marrow | Remission |
| 63 | M | 58 | Bone marrow | Remission |
| 64 | M | 54 | Bone marrow | Remission |
| 65 | F | 27 | Bone marrow | Remission |
| 66 | F | 51 | Bone marrow | Remission |

**Table S4. Patient information on triple negative breast cancer human samples**

| No. | Sex | Age | Organ  | Pathology diagnosis                             | Grade | Stage | TNM    | ER | PR | HER2 |
|-----|-----|-----|--------|-------------------------------------------------|-------|-------|--------|----|----|------|
| 1   | F   | 40  | Breast | Invasive ductal carcinoma                       | 1     | IIB   | T2N1M0 | -  | -  | -    |
| 2   | F   | 45  | Breast | Invasive ductal carcinoma                       | 1     | IIB   | T3N0M0 | -  | -  | -    |
| 3   | F   | 39  | Breast | Invasive ductal carcinoma                       | 1     | IIA   | T2N0M0 | -  | -  | -    |
| 4   | F   | 32  | Breast | Invasive ductal carcinoma                       | 1     | IIB   | T2N1M0 | -  | -  | -    |
| 5   | F   | 68  | Breast | Invasive ductal carcinoma                       | 2     | IIB   | T2N1M0 | -  | -  | -    |
| 6   | F   | 45  | Breast | Invasive ductal carcinoma                       | 1     | IIA   | T1N1M0 | -  | -  | -    |
| 7   | F   | 50  | Breast | Invasive ductal carcinoma                       | 1     | IIB   | T2N1M0 | -  | -  | -    |
| 8   | F   | 54  | Breast | Invasive ductal carcinoma                       | 2     | IIIA  | T2N2M0 | -  | -  | -    |
| 9   | F   | 87  | Breast | Invasive ductal carcinoma                       | 2     | IIB   | T2N1M0 | -  | -  | -    |
| 10  | F   | 39  | Breast | Invasive ductal carcinoma                       | 2     | IIIB  | T4N2M0 | -  | -  | -    |
| 11  | F   | 52  | Breast | Invasive ductal carcinoma                       | 2     | IIB   | T2N1M0 | -  | -  | -    |
| 12  | F   | 58  | Breast | Invasive ductal carcinoma                       | 2     | IV    | T3N2M1 | -  | -  | -    |
| 13  | F   | 56  | Breast | Invasive ductal carcinoma                       | 2     | IIB   | T2N1M0 | -  | -  | -    |
| 14  | F   | 45  | Breast | Invasive ductal carcinoma                       | 2     | I     | T1N0M0 | -  | -  | -    |
| 15  | F   | 60  | Breast | Invasive ductal carcinoma                       | 2     | IIA   | T2N0M0 | -  | -  | 2+   |
| 16  | F   | 66  | Breast | Invasive ductal carcinoma                       | 2     | IIA   | T2N0M0 | -  | -  | -    |
| 17  | F   | 32  | Breast | Invasive ductal carcinoma                       | 2     | IIIA  | T3N1M0 | -  | +  | -    |
| 18  | F   | 41  | Breast | Invasive ductal carcinoma                       | 2     | IIIB  | T4N1M0 | -  | -  | -    |
| 19  | F   | 51  | Breast | Invasive ductal carcinoma                       | 2     | IIIA  | T2N2M0 | -  | -  | -    |
| 20  | F   | 42  | Breast | Invasive ductal carcinoma                       | 2     | IIB   | T2N1M0 | -  | -  | -    |
| 21  | F   | 79  | Breast | Invasive ductal carcinoma                       | 2     | IIB   | T2N1M0 | -  | -  | -    |
| 22  | F   | 72  | Breast | Invasive ductal carcinoma<br>(chronic mastitis) | -     | IIB   | T2N1M0 | -  | -  | 2+   |
| 23  | F   | 50  | Breast | Invasive ductal carcinoma                       | 2     | IIB   | T2N1M0 | -  | -  | -    |
| 24  | F   | 68  | Breast | Invasive ductal carcinoma                       | 2     | IIA   | T2N0M0 | -  | -  | -    |
| 25  | F   | 37  | Breast | Invasive ductal carcinoma                       | 2     | IIB   | T3N0M0 | -  | -  | -    |
| 26  | F   | 40  | Breast | Invasive ductal carcinoma                       | 2     | IIIA  | T3N2M0 | -  | -  | -    |
| 27  | F   | 49  | Breast | Invasive ductal carcinoma                       | 2     | IIIA  | T2N2M0 | -  | -  | -    |
| 28  | F   | 47  | Breast | Invasive ductal carcinoma                       | 3     | IIIB  | T4N1M0 | -  | -  | -    |
| 29  | F   | 49  | Breast | Invasive ductal carcinoma                       | 3     | IIA   | T2N0M0 | -  | -  | -    |
| 30  | F   | 44  | Breast | Invasive ductal carcinoma                       | 3     | IIA   | T2N0M0 | -  | -  | -    |
| 31  | F   | 47  | Breast | Invasive ductal carcinoma                       | 3     | IIIB  | T4N0M0 | -  | -  | -    |
| 32  | F   | 57  | Breast | Invasive ductal carcinoma                       | 2     | IIB   | T3N0M0 | -  | -  | -    |
| 33  | F   | 34  | Breast | Invasive ductal carcinoma                       | 3     | IIA   | T2N0M0 | -  | -  | -    |
| 34  | F   | 51  | Breast | Invasive ductal carcinoma (sparse)              | 3     | IIA   | T2N0M0 | -  | -  | -    |
| 35  | F   | 75  | Breast | Invasive ductal carcinoma                       | 3     | IIB   | T2N1M0 | -  | -  | -    |
| 36  | F   | 48  | Breast | Invasive ductal carcinoma                       | 3     | IIB   | T2N1M0 | -  | -  | -    |
| 37  | F   | 49  | Breast | Invasive ductal carcinoma                       | 3     | IIIA  | T3N1M0 | -  | -  | -    |
| 38  | F   | 40  | Breast | Invasive ductal carcinoma                       | 3     | IIA   | T2N0M0 | -  | -  | -    |
| 39  | F   | 46  | Breast | Invasive ductal carcinoma                       | 3     | IIA   | T2N0M0 | -  | -  | -    |
| 40  | F   | 45  | Breast | Lobular ductal mixed carcinoma                  | -     | IIB   | T2N1M0 | -  | -  | -    |
| 41  | F   | 55  | Breast | Lobular ductal mixed carcinoma                  | -     | IIA   | T2N0M0 | -  | -  | -    |
| 42  | F   | 54  | Breast | Lobular ductal mixed carcinoma                  | -     | IIB   | T2N1M0 | +  | -  | -    |
| 43  | F   | 74  | Breast | Invasive lobular carcinoma                      | -     | IIB   | T2N1M0 | -  | -  | -    |
| 44  | F   | 50  | Breast | Invasive lobular carcinoma                      | -     | IIB   | T2N1M0 | -  | -  | -    |
| 45  | F   | 45  | Breast | Invasive lobular carcinoma                      | -     | IIB   | T2N1M0 | -  | -  | -    |
| 46  | F   | 51  | Breast | Medullary carcinoma                             | -     | IIA   | T2N0M0 | -  | -  | -    |
| 47  | F   | 45  | Breast | Medullary carcinoma                             | -     | IIA   | T2N0M0 | -  | -  | -    |
| 48  | F   | 50  | Breast | Medullary carcinoma                             | -     | IIIA  | T3N1M0 | -  | -  | -    |
